# Supplementary material for: Efficiency and scale effect of county public hospitals in Shandong Province, China: a cross-sectional study
Source: PubMed Central journal article supplement — BMJ Open. 2020 Jun 15;10(6):e035703. doi: 10.1136/bmjopen-2019-035703 (PMC7299019; doi:10.1136/bmjopen-2019-035703), 2020-06-15
Supplement: bmjopen-2019-035703.draft_revisions.pdf [file bmjopen-2019-035703.draft_revisions.pdf]

# BMJ Open

BMJ Open is committed to open peer review. As part of this commitment we make the peer review history of every article we publish publicly available.

When an article is published we post the peer reviewers' comments and the authors' responses online. We also post the versions of the paper that were used during peer review. These are the versions that the peer review comments apply to.

The versions of the paper that follow are the versions that were submitted during the peer review process. They are not the versions of record or the final published versions. They should not be cited or distributed as the published version of this manuscript.

BMJ Open is an open access journal and the full, final, typeset and author-corrected version of record of the manuscript is available on our site with no access controls, subscription charges or pay-per-view fees (<http://bmjopen.bmj.com>).

If you have any questions on BMJ Open's open peer review process please email [info.bmjopen@bmj.com](mailto:info.bmjopen@bmj.com)

# BMJ Open

## Efficiency of County Public Hospitals in Shandong Province, China: the effect of scale

|                               |                                                                                                                                                                                                                                                                                                                                                                                                                                               |
|-------------------------------|-----------------------------------------------------------------------------------------------------------------------------------------------------------------------------------------------------------------------------------------------------------------------------------------------------------------------------------------------------------------------------------------------------------------------------------------------|
| Journal:                      | <i>BMJ Open</i>                                                                                                                                                                                                                                                                                                                                                                                                                               |
| Manuscript ID                 | bmjopen-2019-035703                                                                                                                                                                                                                                                                                                                                                                                                                           |
| Article Type:                 | Original research                                                                                                                                                                                                                                                                                                                                                                                                                             |
| Date Submitted by the Author: | 12-Nov-2019                                                                                                                                                                                                                                                                                                                                                                                                                                   |
| Complete List of Authors:     | Li, Qian; Affiliated Hospital of Medical College Qingdao University, ; Qingdao University,<br>Tian, Liqi; Affiliated Hospital of Medical College Qingdao University<br>Jing, Xiaolin; Affiliated Hospital of Medical College Qingdao University<br>Chen, Xianghua; Affiliated Hospital of Medical College Qingdao University<br>Li, Jiangfeng; Affiliated Hospital of Medical College Qingdao University<br>Chen, Huixin; Qingdao University, |
| Keywords:                     | Health economics < HEALTH SERVICES ADMINISTRATION & MANAGEMENT, Rationing < HEALTH SERVICES ADMINISTRATION & MANAGEMENT, Quality in health care < HEALTH SERVICES ADMINISTRATION & MANAGEMENT                                                                                                                                                                                                                                                 |
|                               |                                                                                                                                                                                                                                                                                                                                                                                                                                               |

SCHOLARONE™  
Manuscripts

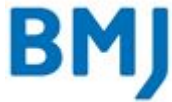

I, the Submitting Author has the right to grant and does grant on behalf of all authors of the Work (as defined in the below author licence), an exclusive licence and/or a non-exclusive licence for contributions from authors who are: i) UK Crown employees; ii) where BMJ has agreed a CC-BY licence shall apply, and/or iii) in accordance with the terms applicable for US Federal Government officers or employees acting as part of their official duties; on a worldwide, perpetual, irrevocable, royalty-free basis to BMJ Publishing Group Ltd ("BMJ") its licensees and where the relevant Journal is co-owned by BMJ to the co-owners of the Journal, to publish the Work in this journal and any other BMJ products and to exploit all rights, as set out in our [licence](#).

The Submitting Author accepts and understands that any supply made under these terms is made by BMJ to the Submitting Author unless you are acting as an employee on behalf of your employer or a postgraduate student of an affiliated institution which is paying any applicable article publishing charge ("APC") for Open Access articles. Where the Submitting Author wishes to make the Work available on an Open Access basis (and intends to pay the relevant APC), the terms of reuse of such Open Access shall be governed by a Creative Commons licence – details of these licences and which [Creative Commons](#) licence will apply to this Work are set out in our licence referred to above.

Other than as permitted in any relevant BMJ Author's Self Archiving Policies, I confirm this Work has not been accepted for publication elsewhere, is not being considered for publication elsewhere and does not duplicate material already published. I confirm all authors consent to publication of this Work and authorise the granting of this licence.

# Efficiency of County Public Hospitals in Shandong Province, China: the effect of scale

Qian Li<sup>1</sup>, Liqi Tian<sup>1</sup>, Xiaolin Jing<sup>1</sup>, Xianghua Chen<sup>1</sup>, Jiangfeng Li<sup>1</sup>, Huixin Chen<sup>2</sup>

## Author affiliations

1. The Affiliated Hospital of Qingdao University, Qingdao, Shandong province, People' s Republic of China
2. Department of Social Medicine and Health Management, School of Medicine, Qingdao University, Qingdao, Shandong province, People' s Republic of China

## Correspondence to

Dr Li-qi Tian; tlq1738@sina.com

## Abstract

**Objective:** The relationship between hospital scale and efficiency is of interest to hospital administrators. The study intends to evaluate the efficiency of 68 county public hospitals in Shandong Province after the new medical reform in China and compare the efficiency of hospitals with different bed sizes.

**Design and setting:** Cross-sectional study of 68 county-level public hospitals in Shandong Province, China in 2017.

**Outcome measures:** Data Envelopment Analysis (DEA) was used to calculate the efficiency scores of 68 hospitals and analyzed the slack values of non-effective hospitals. Kruskal-Wallis H test was employed to compare the efficiency of hospitals of different bed sizes. Chi-square ( $\chi^2$ ) test was used to compare the returns to scale (RTS) of hospitals with different bed sizes.

**Results:** 20 (29.41%) hospitals were effective. There are 27 hospitals with increasing returns to scale (IRS), 23 hospitals with constant returns to scale (CRS), and 18 hospitals with

1  
2  
3  
4 decreasing returns to scale (DRS) . The difference of the technical efficiency (TE,  $p=0.248$ ,  
5  $p>0.05$ ) and the pure technical efficiency (PTE,  $p=0.073$ ,  $p>0.05$ ) were not statistically  
6 significant. However, the difference of scale efficiency (SE,  $p=0.047$ ,  $p<0.05$ ) and returns to  
7 scale (RTS,  $p=0.000$ ,  $P<0.05$ ) were statistically significant.  
8  
9  
10

11  
12 **Conclusions:** 70.59% of county public hospitals have problems with excessive input or  
13 insufficient production. When the hospital bed size exceeds 885 beds, it will bring about a  
14 decrease in scale efficiency (SE) of the hospital.  
15  
16  
17

### 18 19 **Strengths and limitations of this study**

20  
21 The study evaluated the status of the county public hospitals in Shandong after the new  
22 medical reform, which played a certain warning role for hospital administrators.  
23  
24

25  
26 This study explored the efficiency differences of hospitals in Shandong Province from the  
27 scale, and the scale difference was a good research direction.  
28  
29

30  
31 Although the research raised doubts to the blind expansion of the hospital scale, it failed to  
32 propose a scientific scale prediction model.  
33  
34

35  
36 This study only had hospital data for 2017, failed to form panel data and lacked longitudinal  
37 analysis and comparison.  
38  
39

40  
41 **Keywords:** County public hospital, Data envelopment analysis, Technical efficiency,  
42 Scale  
43  
44

### 45 46 **Introduction**

47  
48 The pursuit of efficiency has become the central objective of policy-makers and hospital  
49 administrator.<sup>1</sup> By studying hospital efficiency, hospital policy makers can develop effective  
50 policies to guide the hospital to improve inefficiencies. Hospital administrators can  
51 understand whether medical resources are optimally allocated and fully utilized. Initially,  
52 there was a lack of international consensus on the best way to evaluate the efficiency of  
53 hospital operations. Researchers in various countries have tried various methods. The  
54  
55  
56  
57  
58  
59  
60

1  
2  
3  
4 evaluation of hospital efficiency now focuses on the use of economic models, especially in  
5 developing countries.<sup>2 3</sup> Many studies have shown that data envelopment analysis (DEA)  
6 is an important tool in evaluating hospital efficiency.<sup>4-6</sup>  
7  
8  
9

10 More recent studies on hospital scale efficiency (SE) have been focusing on analysing  
11 the appropriate use of resources<sup>7 8</sup> and estimating the optimal size of hospitals<sup>9-11</sup> to improve  
12 hospital performance. In the process of maintaining and promoting people's health, county  
13 public hospitals in China provide more and more high-quality and accessible health services.  
14 However, the status of service in county public hospitals in China is far worse than expected.  
15 There are some problems such as the blind expansion of scale. Whether it is a county  
16 secondary hospital or a city's tertiary hospital, it relies too much on scale expansion to bring  
17 benefits to the hospital. Unexpectedly, the number of beds in a hospital in China has reached  
18 10,000. The more hospital beds, the better the hospital's efficiency? In order to answer the  
19 above doubts, this study evaluated the efficiency of county public hospitals and discussed the  
20 impact of scale on hospital efficiency. We are looking forward to this study to provide  
21 reference for other countries to evaluate hospital efficiency and develop hospital scale.  
22  
23  
24  
25  
26  
27  
28  
29  
30  
31  
32  
33

## 34 **Methods**

### 35 **Sample and data selection**

36  
37  
38 County public hospitals are important carriers for the Chinese government to provide basic  
39 medical and health services to residents in county areas. These hospitals mainly undertake the  
40 diagnosis and treatment of common diseases and frequently-occurring diseases of county  
41 residents, the rescue of critically ill patients and the referral of patients with difficult diseases,  
42 and are responsible for training and guiding grassroots medical personnel. The original data  
43 initially included 71 county public hospitals of Shandong Province. Considering the integrity  
44 and availability of data, 68 county public hospitals that met the study inclusion criteria were  
45 eventually included. These hospitals came from 68 municipal districts(county  
46 cities,counties) distributed in 15 prefecture-level cities in Shandong Province.  
47  
48  
49  
50  
51  
52  
53  
54  
55  
56  
57  
58

59 Located in the eastern part of China, Shando ng Province is one of the major coastal  
60

provinces in China. There are a total of 17 prefecture-level cities, which cover 49 municipal districts, 31 county cities and 60 counties. It is also a populous province in China. At the end of 2017, the total resident population reached more than 100 million. Shandong Province took the lead in starting comprehensive reform of county public hospitals in China, and had exemplary role in the country. In 2017, the average annual number of visits per hospital in the county public hospitals in Shandong Province was 527,816. Therefore, using Shandong Province as a sample to study the efficiency of China's county public hospitals was representative.

The data set of the research was collected from the health statistics information reporting system of the Hospital Management Research Institute of Qingdao University, Shandong Province, which mainly included the operational data of the county public hospitals in 2017. This research finally determined seven indicators that meet the efficiency evaluation criteria of hospitals. The study used the actual number of open beds, the number of doctors, the number of nurses, and the total expenditure as input indicators, representing the investment in three aspects of human, financial and material resources. The total number of annual visits, the number of discharged, and the total income were used as output indicators to represent the quantity, quality and benefits of medical services. The evaluation index was comprehensively determined by combining many previous literatures and the characteristics of the research objects.<sup>12-16</sup> The calculation process was implemented by means of DEAP(V2.1) software. The specific indicators were explained in Table 1.

Table 1 Definition of input and output indicators

| Category | Indicators                    | Definition                                                       |
|----------|-------------------------------|------------------------------------------------------------------|
| Inputs   | Actual number of open beds    | The number of beds actually opened at the end of the year.       |
|          | Number of doctors             | The number of practicing (assistant) physicians.                 |
|          | Number of nurses              | The number of qualified nurse practitioners.                     |
| Outputs  | Total expenditure             | The expenses incurred by the hospital at the end of the year.    |
|          | Total number of annual visits | All the number of visits counted by the number of registrations. |

|  |                      |                                                                 |
|--|----------------------|-----------------------------------------------------------------|
|  | Number of discharged | The number of all discharged patients after hospitalization.    |
|  | Total income         | The total income earned by the hospital at the end of the year. |

## Data Envelopment Analysis (DEA)

### Introduction to DEA

Data Envelopment Analysis (DEA) is a method of evaluation by using the concepts and connotations of relative efficiency<sup>17</sup> and the convex analysis method and linear programming method as tools by the famous American operations research experts A.Charnes and W.W. Cooper in 1978.<sup>4 18</sup> Since DEA was introduced to health econometrics in the mid-1980s, it has become more and more widely used in the field of health care, and has become an important method for evaluating hospital efficiency. The main evaluation models of DEA are CCR, BCC, CCW, CCGSS, CCWH and so on. The most commonly used models for evaluating hospital relative efficiency are the CCR and BCC models.<sup>1</sup>

Through the comprehensive analysis of the input and output data, DEA can obtain the technical efficiency index of each decision-making unit (DMU), and according to the score, the effective DMUs can be determined. It can not only evaluate and rank the relative effectiveness of the same type of DMUs, but also further analyze the reasons and improvement directions of each non-effective DMU. At the same time, DEA determines the weights based on the actual data of the input-output of DMUs, and eliminates the influence of many subjective factors and artificial tendencies.

### The principle of DEA

The most commonly used CCR and BCC models have both input and output oriented types. The input-oriented model refers to how to reduce the proportion of input in order to optimize efficiency without changing the quantity of output. The output-oriented model refers to how to increase or maximize output without changing the proportion of input.<sup>4 16</sup> In this study, a two-stage DEA was used to conduct research using the CCR and BCC models of the output-oriented model.

Charnes extended and developed the DEA approach assuming constant return to



scale(CRS) as a sensitive model for measuring technical efficiency (TE).<sup>19</sup> The CCR model is based on the assumption of the CRS, which is mainly used to measure the TE score of the DMUs, with a score of 0-1. When the score is 1, it indicates that the DMU is effective. When the efficiency score value is less than 1, the DMU is considered to be inefficient. The closer the efficiency score is to 1, the higher the technical efficiency of the DMU is.

$$(D_{CCR}) \begin{cases} \max \phi \\ \sum_{j=1}^n x_j \lambda_j \leq x_0 \\ \sum_{j=1}^n y_j \lambda_j \geq \phi y_0 \\ \lambda_j \geq 0, j = 1, 2, \dots, n \end{cases}$$

$$x_j = (x_{1j}, x_{2j}, \dots, x_{mj})^T > 0, y_j = (y_{1j}, y_{2j}, \dots, y_{sj})^T > 0, \\ x_0 = x_{j_0}, y_0 = y_{j_0}, 1 \leq j_0 \leq n$$

The predecessors then developed a second DEA model based on the variable return to scale(VRS) to separate pure technical efficiency (PTE) from scale efficiency.<sup>20</sup> The BCC model is based on the assumption of the VRS, and is mainly used to measure the pure technical efficiency (PTE) and scale efficiency (SE) of the DMU.<sup>21</sup> The BCC model is an extension of the CCR model.

$$(D_{BCC}) \begin{cases} \min \phi \\ \sum_{j=1}^n x_j \lambda_j \leq x_0 \\ \sum_{j=1}^n y_j \lambda_j \geq \phi y_0 \\ \sum_{j=1}^n \lambda_j = 1 \\ \lambda_j \geq 0, j = 1, 2, \dots, n \end{cases}$$

$$x_j = (x_{1j}, x_{2j}, \dots, x_{mj})^T > 0, y_j = (y_{1j}, y_{2j}, \dots, y_{sj})^T > 0, \\ x_0 = x_{j_0}, y_0 = y_{j_0}, 1 \leq j_0 \leq n$$

## Statistical methods

This study defined the size of the hospital based on the actual number of open beds. According to the standard of 500 beds and below, 501-1000 beds, 1001-1500 beds and 1501 beds and above, 68 sample hospitals were divided into small, medium, large and oversized groups. Kruskal-Wallis H non-parametric test was used to analyze and compare the efficiency of county public hospitals with different bed sizes. Efficiency included technical efficiency (TE), pure technical efficiency (PTE), and scale efficiency (SE). The Chi-square ( $\chi^2$ ) test was used to compare the differences in the scale returns of county public hospitals with different bed sizes. Statistical analysis was performed using SPSS 25.0 software (IBM, Armonk, NY).

## Results

### Description of input and output indicators.

Table 2 was a descriptive summary of the input and output indicators of 68 sample hospitals. The results showed that in 2017, the average number of open beds per hospital was 991.0. The average number of doctors and nurses per hospital was 352.7 and 529.3 respectively, and the ratio of doctors to nurses was 1:1.5. With an average of 527,816.1 visits per hospital per year, the efficiency of the county public hospitals was commendable.

Table 2 Description of input and output indicators

| Indicators                    | Minimum | Maximum   | Average  | Sd       |
|-------------------------------|---------|-----------|----------|----------|
| Input indicators              |         |           |          |          |
| Actual number of open beds    | 185.0   | 2220.0    | 991.0    | 373.6    |
| Number of doctors             | 101.0   | 670.0     | 352.7    | 126.3    |
| Number of nurses              | 149.0   | 971.0     | 529.3    | 191.5    |
| Total expenditure             | 8184.0  | 90030.0   | 41587.8  | 17910.3  |
| Output indicators             |         |           |          |          |
| Total number of annual visits | 87116.0 | 1511751.0 | 527816.1 | 257916.2 |

|                      |        |         |         |         |
|----------------------|--------|---------|---------|---------|
| Number of discharged | 8689.0 | 99565.0 | 43127.6 | 17099.7 |
| Total income         | 8133.3 | 91991.0 | 42958.6 | 18356.4 |

### Hospital efficiency score from the DEA model

Table 3 showed the distribution of efficiency scores for 68 sample hospitals. Only 20 (29.41%) hospitals which technical efficiency calculated to be 100% effective, and 53 hospitals (77.94%) were ineffective. The pure technical efficiency of 26 (38.24%) hospitals was effective, and the remaining 42 (61.76%) were ineffective. All 68 hospitals had a scale efficiency score above 0.900, but only 23(33.82%) were fully effective.

Table 3 Distribution of efficiency scores

| Efficiency                | 1.000       | 0.999-0.900 | 0.899-0.800 | 0.799-0.700 |
|---------------------------|-------------|-------------|-------------|-------------|
| Technical efficiency      | 20 (29.41%) | 32 (47.06%) | 15 (22.06%) | 1 (1.47%)   |
| Pure technical efficiency | 26 (38.24%) | 30 (44.12%) | 11 (16.18%) | 1 (1.47%)   |
| Scale efficiency          | 23 (33.82%) | 45 (66.18%) | 0 (0.00%)   | 0 (0.00%)   |

Figure 1 depicted the returns to scale of 68 hospitals. 23 hospitals with a scale efficiency score equal to 1 were constant scale returns. This meant that these hospitals were not only at the optimal bed size, but also had the lowest production and operation costs, and the inputs and outputs were also in balance. Hospitals with ineffective scale were divided into two categories: increasing returns to scale (IRS) and decreasing returns to scale (DRS). The 27 hospitals with IRS had insufficient resources and needed to continue to expand their scale to achieve better conditions. The 18 hospitals with DRS had over-invested in health resources, and needed to scale down and optimize the allocation of existing health resources.

Figure 1 Distribution of return to scale in sample hospitals

### Slack value of input and output indicators of inefficiency hospitals

The study analyzed the slack values of 48 ineffective county public hospitals. In other words, it was to analyze the difference between the actual value and the ideal value of the hospital

input indexes at a certain output level. The slack value of the input index referred to the amount that the input should be reduced in order to achieve efficiency optimization under current technical and output conditions. The slack value of the output indicator referred to the amount that the output should be increased under the existing output conditions. Taking H1 hospital as an example, the actual number of doctors in H1 hospital was 38.83 more than the ideal standard compared with effective hospitals. There were certain gaps between the hospital's output indicators and the ideal values. As shown in Table 4, H1 hospital should increase the total number of annual visits by 15%, the number of discharged by 6%, and the total income of 6% to fully utilize the existing resources.

Table 4 The slack value of input and output indicators of hospital H1

| DMU | Slack value  | Input and output indicators |         |        |             |           |            |          |
|-----|--------------|-----------------------------|---------|--------|-------------|-----------|------------|----------|
|     |              | Beds                        | Doctors | Nurses | Expenditure | Visiting  | Discharged | Income   |
| H1  | Actual value | 717.0                       | 300.0   | 344.0  | 27508.0     | 418402.0  | 35536.0    | 28743.0  |
|     | Ideal value  | 717.0                       | 261.2   | 344.0  | 27508.0     | 479793.2  | 37800.8    | 30574.8  |
|     | Slack value  | 0.00                        | 38.83   | 0.00   | 0.00        | -61391.24 | -2264.77   | -1831.84 |
|     | Change ratio | 0%                          | 13%     | 0%     | 0%          | -15%      | -6%        | -6%      |

### Differences in efficiency between hospitals of different bed sizes

#### Differences in TE, PTE and SE between hospitals of different bed sizes

Hypothesis testing was performed using the Kruskal-Wallis H test to compare the efficiency differences of county public hospitals of different bed sizes. The result demonstrated that there were no significant difference in TE ( $P=0.248$ ,  $P>0.05$ ) and PTE ( $P=0.073$ ,  $P>0.05$ ) between the four comparison groups in 2017. However, it can be seen that the difference in SE was statistically significant ( $P=0.047$ ,  $P<0.05$ ). See Table 5 for details.

Table 5 Comparison of technical efficiency of hospitals with different bed sizes

| Efficiency | Hospital scale | $\bar{X}\pm S$ | $\chi^2$ value | $P$ value |
|------------|----------------|----------------|----------------|-----------|
|------------|----------------|----------------|----------------|-----------|

|                           |                 |             |        |       |
|---------------------------|-----------------|-------------|--------|-------|
| Technical efficiency      | Small scale     | 0.965±0.049 | 4.131  | 0.248 |
|                           | Medium scale    | 0.927±0.064 |        |       |
|                           | Large scale     | 0.957±0.045 |        |       |
|                           | Oversized scale | 0.930±0.046 |        |       |
| Pure technical efficiency | Small scale     | 0.983±0.031 | 6.954  | 0.073 |
|                           | Medium scale    | 0.934±0.060 |        |       |
|                           | Large scale     | 0.967±0.041 |        |       |
|                           | Oversized scale | 0.979±0.037 |        |       |
| Scale efficiency          | Small scale     | 0.989±0.022 | 10.321 | 0.047 |
|                           | Medium scale    | 0.992±0.011 |        |       |
|                           | Large scale     | 0.989±0.013 |        |       |
|                           | Oversized scale | 0.951±0.032 |        |       |

### Differences in returns to scale between hospitals of different bed sizes

When sorting out the data, it was found that when the number of beds in the sample hospitals was more than 885, the RTS began to enter a decreasing state. A large number of hospitals in large-scale and super large-scale groups were already in a state of decreasing returns to scale (DRS). Since the data of scale remuneration was disorderly classification data, the Chi-square ( $\chi^2$ ) test was used to analyze the difference in the status of RTS of hospitals in different groups. The findings in table 6 suggested that the difference of the RTS of hospitals with different bed sizes was significant ( $P=0.000$ ,  $P<0.05$ ).

Table 6 Comparison of the scale returns of hospitals with different bed sizes

|              | Decreasing  | RTS constant | Increasing  | $\chi^2$ value | <i>P</i> value |
|--------------|-------------|--------------|-------------|----------------|----------------|
| Small scale  | 2 (50%)     | 2 (50%)      | 0 (0%)      | 32.023         | 0.000          |
| Medium scale | 23 (63.89%) | 11 (30.56%)  | 2 (5.56%)   |                |                |
| Large scale  | 2 (8.70%)   | 9 (39.13%)   | 12 (52.17%) |                |                |

---

|                 |        |         |         |
|-----------------|--------|---------|---------|
| Oversized scale | 0 (0%) | 1 (20%) | 4 (80%) |
|-----------------|--------|---------|---------|

---

## Discussion

More and more countries have been using DEA to evaluate hospital efficiency.<sup>1 2 13 22</sup> However, due to different national backgrounds and management models, the focus of research on hospital efficiency is different. The blind expansion of bed size is a common problem in Chinese hospitals. Whether in public hospitals or private hospitals, China still has controversy about the size of hospital beds. Our research not only evaluated the efficiency of 68 county public hospitals, but also further explored the difference in hospital efficiency based on the problems found, and predicted the optimal size of the hospital.

The findings indicated that 48 (70%) of the 68 county public hospitals in Shandong Province were ineffective. That was to say, more than 70% of hospitals had problems of excessive investment or insufficient output, which was consistent with the findings of many experts.<sup>23-25</sup> Zhaohui Cheng, et al,<sup>23</sup> suggested that only 8.8% of the 114 sample hospitals in Henan county hospital of China in 2012 were defined as overall technically effective, indicating the need to improve efficiency. Qin Liu, et al,<sup>26</sup> investigated the operational efficiency of 36 county public general hospitals in Guangxi in 2016. It was found that the average technical efficiency of hospitals was 0.957, and only 14 hospitals were effective. This study also identified the level of increase or decrease in output that inefficient hospitals need to make in order to become relatively efficient. For example, H1 hospital should increase the total number of annual visits by 15%, the number of discharged by 6%, and the total income of 6% to fully utilize the existing resources. The output indicators of ineffective hospitals generally had relatively high slack values, and a large part of the reason was that the hospital had not realized the full use of resources. Zhang Yue's research on the equity and efficiency of primary health care resource allocation in mainland China suggested that many provinces have resources that are idle and underutilized.<sup>27</sup> This may be due to the inefficient use of resources by medical staff. It may also be because county hospitals are limited by their own service capabilities, resulting in the loss of patients, which in turn makes resources idle and difficult to use effectively.

1  
2  
3  
4 68 county public hospitals scored higher on PTE, with an average score of 0.951.  
5  
6 Excluding the impact of scale factors, hospitals have brought better improvements in  
7  
8 efficiency through pure technology. Not only Shandong Province, but also other areas of  
9  
10 China have given strong support and attention to the investment and renewal of medical  
11  
12 equipment, the strengthening of hospital information system<sup>28</sup> and the connection of Internet  
13  
14 hospitals. The difference of pure technical efficiency was not significant. It can be speculated  
15  
16 that the Siphon effect of scale on medical technology and equipment has been alleviated. In  
17  
18 the future, no matter the size of the hospital, medical technology and equipment will  
19  
20 gradually achieve fairness and homogeneity. This will be a good vision for future hospital  
21  
22 development.

23  
24 After professional analysis, the study found that the size of the bed will affect the SE and  
25  
26 RTS of hospitals. The size of hospital beds was not the bigger the better, but subjected to the  
27  
28 law of decreasing marginal utility of Economics.<sup>29</sup> Below a critical point, an increase in the  
29  
30 number of hospital beds can lead to an increasing efficiency, and beyond this critical point, an  
31  
32 increase in the number of beds results in a decreasing efficiency. Research undertaken largely  
33  
34 in the USA and the United Kingdom indicated that diseconomies of scale can be expected  
35  
36 to occur below approximately 200 beds and above 600 beds.<sup>30 31</sup> This study revealed that the  
37  
38 number of beds in county public hospitals in Shandong Province was more than 885, and  
39  
40 began to enter the state of decreasing returns to scale (DRS). However, Siping Dong stated  
41  
42 that the vast majority of county hospitals in Hubei Province had more than 335 beds, which  
43  
44 was generally in a state of decreasing returns to scale.<sup>32</sup> The results of the two studies were  
45  
46 quite different. Over time, this may be related to different factors such as the population base  
47  
48 of different provinces and the release of medical service demand due to the expansion of  
49  
50 China's medical insurance coverage.

## 51 52 **Conclusions**

53  
54  
55 This study evaluated and compared the efficiency of 68 county public hospitals in Shandong  
56  
57 Province by using DEA. The county public hospitals had higher efficiency scores, but most  
58  
59 hospitals had problems of the unreasonable allocation and inadequate utilization of health  
60

1  
2  
3  
4 resources. Hospitals should fully mobilize the enthusiasm of medical staff, continuously  
5 improve human efficiency, and improve the hospital's medical service capabilities. Moreover,  
6 pure technical efficiency is a mediator between human efficiency and higher output levels in  
7 hospitals. The synergy between human efficiency and pure technical efficiency will bring  
8 higher operational efficiency to hospitals.  
9  
10  
11  
12

13  
14 The study further demonstrated that blind expansion of bed size does not lead to greater  
15 hospital efficiency. County general hospitals should avoid blindly expanding the scale of  
16 hospitals and take various effective measures to improve the efficiency. As a main body  
17 serving county residents, county general hospitals should accurately locate the hospital's  
18 service content according to the function of the hospital, the medical service demand  
19 categories of the residents within the jurisdiction, the number and structure of the service  
20 population. The hospital should further optimize the size of the hospital bed to ensure  
21 economies of scale. For hospitals that have a negative effect on bed size, hospitals must focus  
22 on improving the efficiency of pure technology in order to improve technical efficiency.  
23  
24  
25  
26  
27  
28  
29  
30  
31

### 32 **Acknowledgement**

33  
34  
35  
36 We would like to thank 71 county public hospitals for their cooperation and provide us  
37 with true hospital data. We are very pleased with all the staff of the Hospital Management  
38 Research Institute of Qingdao University. They are very enthusiastic about the aggregation  
39 and cleaning of the data of 71 hospitals, so that we have an intuitive understanding of the  
40 data. Thanks to Xiaolin Jing for giving me a lot of guidance on the writing of the thesis and  
41 the correction of the grammar.  
42  
43  
44  
45  
46  
47  
48

49 **Contributors:** LT and JL contributed to the conceptualization and design of the research.  
50  
51 XC and HC spared no effort to collect and standardize data. QL and XC contributed to the  
52 analysis and interpretation of the data and provided statistical analysis support. XJ gave  
53 guidance on the writing of the article. QL drafted the article. All authors critically revised the  
54 manuscript and eventually approved the version to be released.  
55  
56  
57  
58  
59

60 **Funding:** The authors have not declared a specific grant for this research from any funding



agency.

**Competing interests:** None declared.

**Ethics approval:** An ethics disclaimer form for this study was submitted to the Qingdao University Ethics Committee prior to the start of the study.

**Provenance and peer review:** Not commissioned; externally peer reviewed.

**Data availability statement:** The authors will not share the data for this work. The data for this study were obtained through an application to the Institute of Hospital Management of Qingdao University.

## References

1. Jia T, Yuan H. The application of DEA (Data Envelopment Analysis) window analysis in the assessment of influence on operational efficiencies after the establishment of branched hospitals. *BMC health services research* 2017;**17**(1):265 doi: 10.1186/s12913-017-2203-6[published Online First: Epub Date].
2. Osei D, d'Almeida S, George MO, et al. Technical efficiency of public district hospitals and health centres in Ghana: a pilot study. *Cost effectiveness and resource allocation* : C/E 2005;**3**:9 doi: 10.1186/1478-7547-3-9[published Online First: Epub Date].
3. Marschall P, Flessa S. Efficiency of primary care in rural Burkina Faso. A two-stage DEA analysis. *Health economics review* 2011;**1**(1):5 doi: 10.1186/2191-1991-1-5[published Online First: Epub Date].
4. Marschall P, Flessa S. Assessing the efficiency of rural health centres in Burkina Faso: an application of Data Envelopment Analysis. *Journal of Public Health* 2009;**17**(2):87
5. Kirigia JM, Sambo LG, Renner A, et al. Technical efficiency of primary health units in Kailahun and Kenema districts of Sierra Leone. *International archives of medicine* 2011;**4**:15 doi: 10.1186/1755-7682-4-15[published Online First: Epub Date].
6. Ichoku HE, Fonta WM, Onwujekwe OE, et al. Evaluating the Technical Efficiency of Hospitals in Southeastern Nigeria. *Eur J Bus Manag* 2011;**3**:24-37
7. Kirigia JM, Emrouznejad A, Cassoma B, et al. A performance assessment method for hospitals:

- 1  
2  
3 the case of municipal hospitals in Angola. *Journal of medical systems* 2008;**32**(6):509-19 doi:  
4 10.1007/s10916-008-9157-5[published Online First: Epub Date]].  
5  
6  
7 8. Varabyova Y, Schreyogg J. International comparisons of the technical efficiency of the hospital  
8 sector: panel data analysis of OECD countries using parametric and non-parametric approaches.  
9 *Health policy* 2013;**112**(1-2):70-9 doi: 10.1016/j.healthpol.2013.03.003[published Online First:  
10 Epub Date]].  
11  
12  
13 9. Azevedo H, Mateus C. Cost effects of hospital mergers in Portugal. *The European journal of health*  
14 *economics : HEPAC : health economics in prevention and care* 2014;**15**(9):999-1010 doi:  
15 10.1007/s10198-013-0552-6[published Online First: Epub Date]].  
16  
17  
18 10. Kristensen T, Bogetoft P, Pedersen KM. Potential gains from hospital mergers in Denmark.  
19 *Health care management science* 2010;**13**(4):334-45 doi: 10.1007/s10729-010-9133-8[published  
20 Online First: Epub Date]].  
21  
22  
23 11. Weaver M, Deolalikar A. Economies of scale and scope in Vietnamese hospitals. *Social science*  
24 *& medicine* (1982) 2004;**59**(1):199-208 doi: 10.1016/j.socscimed.2003.10.014[published Online  
25 First: Epub Date]].  
26  
27  
28 12. Sultan WIM, Crispim J. Measuring the efficiency of Palestinian public hospitals during  
29 2010-2015: an application of a two-stage DEA method. *BMC health services research*  
30 2018;**18**(1):381 doi: 10.1186/s12913-018-3228-1[published Online First: Epub Date]].  
31  
32  
33 13. Du J, Wang J, Yao C, et al. Incorporating health outcomes in Pennsylvania hospital efficiency: an  
34 additive super-efficiency DEA approach. *Annals of Operations Research* 2014;**221**(1):161-72  
35  
36  
37 14. Kjekshus L, Hagen T. Do hospital mergers increase hospital efficiency? Evidence from a  
38 National Health Service country. *Journal of health services research & policy*  
39 2007;**12**(4):230-5 doi: 10.1258/135581907782101561[published Online First: Epub Date]].  
40  
41  
42 15. Afonso A, Fernandes S. Assessing Hospital Efficiency: Non-Parametric Evidence for Portugal.  
43 SSRN Electronic Journal  
44  
45  
46 16. Li H, Dong S, Liu T. Relative efficiency and productivity: a preliminary exploration of public  
47 hospitals in Beijing, China. *BMC health services research* 2014;**14**:158 doi:  
48 10.1186/1472-6963-14-158[published Online First: Epub Date]].  
49  
50  
51 17. Farrell MJ. The Measurement of Productive Efficiency. *Journal of the Royal Statistical Society*  
52 1957;**120**(3):253-90  
53  
54  
55 18. Ferreira C, Marques RC, Nicola P. On evaluating health centers groups in Lisbon and Tagus  
56 Valley: efficiency, equity and quality. *BMC health services research* 2013;**13**:529 doi:  
57  
58  
59  
60

- 1  
2  
3 10.1186/1472-6963-13-529[published Online First: Epub Date]].  
4  
5  
6 19. Charnes A, Clark CT, Cooper WW, et al. A developmental study of data envelopment analysis in  
7 measuring the efficiency of maintenance units in the U.S. air forces. *Annals of Operations*  
8 *Research* 1984;**2**(1):95-112  
9  
10  
11 20. Jacobs R. Alternative methods to examine hospital efficiency: data envelopment analysis and  
12 stochastic frontier analysis. *Health care management science* 2001;**4**(2):103-15  
13  
14  
15 21. Banker RD, Charnes A, Cooper WW. Some Models for Estimating Technical and Scale  
16 Inefficiencies in Data Envelopment Analysis. *Management Science* 1984;**30**(9):1078-92  
17  
18  
19 22. Servan-Mori E, Chivardi C, Mendoza MA, et al. A longitudinal assessment of technical  
20 efficiency in the outpatient production of maternal health services in Mexico. *Health policy and*  
21 *planning* 2018;**33**(8):888-97 doi: 10.1093/heapol/czy074[published Online First: Epub Date]].  
22  
23  
24 23. Cheng Z, Tao H, Cai M, et al. Technical efficiency and productivity of Chinese county hospitals:  
25 an exploratory study in Henan province, China. *BMJ open* 2015;**5**(9):e007267 doi:  
26 10.1136/bmjopen-2014-007267[published Online First: Epub Date]].  
27  
28  
29 24. Wang X, Luo H, Qin X, et al. Evaluation of performance and impacts of maternal and child  
30 health hospital services using Data Envelopment Analysis in Guangxi Zhuang Autonomous  
31 Region, China: a comparison study among poverty and non-poverty county level hospitals.  
32 *International journal for equity in health* 2016;**15**(1):131 doi:  
33 10.1186/s12939-016-0420-y[published Online First: Epub Date]].  
34  
35  
36  
37 25. Sun J, Luo H. Evaluation on equality and efficiency of health resources allocation and health  
38 services utilization in China. *International journal for equity in health* 2017;**16**(1):127 doi:  
39 10.1186/s12939-017-0614-y[published Online First: Epub Date]].  
40  
41  
42  
43 26. Liu Q, Chang RJ, Bi HM, et al. Study on the factors affecting the efficiency of Guangxi  
44 county-level public hospitals based on three-stage DEA-Tobit regression model. *Chin J Medicine*  
45 *and Social* 2019;**32**(09):102-05  
46  
47  
48 27. Zhang Y, Wang Q, Jiang T, et al. Equity and efficiency of primary health care resource allocation  
49 in mainland China. *International journal for equity in health* 2018;**17**(1):140 doi:  
50 10.1186/s12939-018-0851-8[published Online First: Epub Date]].  
51  
52  
53  
54 28. Zhou WT, Jin Cl, Li F, et al. Analysis of operational efficiency of health system in districts and  
55 counties of Shanghai. *Chin Health Stat* 2017;**34**(03):445-47+52  
56  
57  
58 29. Hefty TR. Returns to scale in hospitals: a critical review of recent research. *Health services*  
59 *research* 1969;**4**(4):267-80  
60

- 1
- 2
- 3
- 4 30. Roh CY, Moon MJ, Jung C. Measuring Performance of U.S. Nonprofit Hospitals. *Public*
- 5 *Performance & Management Review* 2010;**34**(1):22-37
- 6
- 7 31. Giacotti M, Guglielmo A, Mauro M. Efficiency and optimal size of hospitals: Results of a
- 8 systematic search. *PloS one* 2017;**12**(3):e0174533 doi: 10.1371/journal.pone.0174533[published
- 9 Online First: Epub Date]].
- 10
- 11
- 12 32. Dong SP. Study on the efficiency of scale economy and its influencing factors in county-level
- 13 general hospitals [D]. Huazhong University of Science and Technology, 2010.
- 14
- 15
- 16
- 17
- 18
- 19
- 20
- 21
- 22
- 23
- 24
- 25
- 26
- 27
- 28
- 29
- 30
- 31
- 32
- 33
- 34
- 35
- 36
- 37
- 38
- 39
- 40
- 41
- 42
- 43
- 44
- 45
- 46
- 47
- 48
- 49
- 50
- 51
- 52
- 53
- 54
- 55
- 56
- 57
- 58
- 59
- 60

1  
2  
3  
4 Figure 1 depicted the returns to scale of 68 hospitals. 23 hospitals with a scale efficiency  
5 score equal to 1 were constant scale returns. This meant that these hospitals were not only at  
6 the optimal bed size, but also had the lowest production and operation costs, and the inputs  
7 and outputs were also in balance. Hospitals with ineffective scale were divided into two  
8 categories: increasing returns to scale (IRS) and decreasing returns to scale (DRS). The 27  
9 hospitals with IRS had insufficient resources and needed to continue to expand their scale to  
10 achieve better conditions. The 18 hospitals with DRS had over-invested in health resources,  
11 and needed to scale down and optimize the allocation of existing health resources.  
12  
13  
14  
15  
16  
17  
18  
19

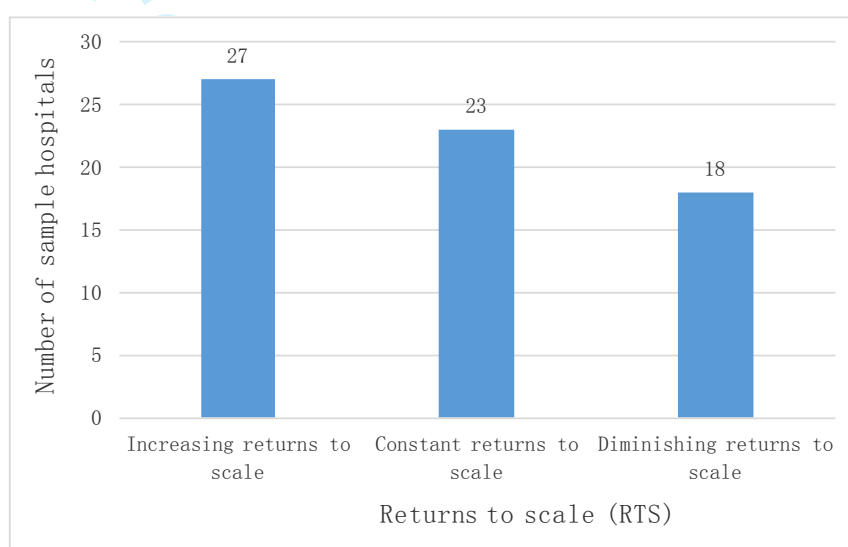

20  
21  
22  
23  
24  
25  
26  
27  
28  
29  
30  
31  
32  
33  
34  
35  
36  
37  
38  
39  
40  
41  
42  
43  
44  
45  
46  
47  
48  
49  
50  
51  
52  
53  
54  
55  
56  
57  
58  
59  
60  
Figure 1 Distribution of return to scale in sample hospitals

# BMJ Open

## A Study on the Efficiency and Scale Effect of County Public Hospitals in Shandong Province, China

|                                 |                                                                                                                                                                                                                                                                                                                                                                                                                                               |
|---------------------------------|-----------------------------------------------------------------------------------------------------------------------------------------------------------------------------------------------------------------------------------------------------------------------------------------------------------------------------------------------------------------------------------------------------------------------------------------------|
| Journal:                        | <i>BMJ Open</i>                                                                                                                                                                                                                                                                                                                                                                                                                               |
| Manuscript ID                   | bmjopen-2019-035703.R1                                                                                                                                                                                                                                                                                                                                                                                                                        |
| Article Type:                   | Original research                                                                                                                                                                                                                                                                                                                                                                                                                             |
| Date Submitted by the Author:   | 29-Jan-2020                                                                                                                                                                                                                                                                                                                                                                                                                                   |
| Complete List of Authors:       | Li, Qian; Affiliated Hospital of Medical College Qingdao University, ; Qingdao University,<br>Tian, Liqi; Affiliated Hospital of Medical College Qingdao University<br>Jing, Xiaolin; Affiliated Hospital of Medical College Qingdao University<br>Chen, Xianghua; Affiliated Hospital of Medical College Qingdao University<br>Li, Jiangfeng; Affiliated Hospital of Medical College Qingdao University<br>Chen, Huixin; Qingdao University, |
| <b>Primary Subject Heading</b>: | Health economics                                                                                                                                                                                                                                                                                                                                                                                                                              |
| Secondary Subject Heading:      | Health policy, Health services research                                                                                                                                                                                                                                                                                                                                                                                                       |
| Keywords:                       | Health economics < HEALTH SERVICES ADMINISTRATION & MANAGEMENT, Rationing < HEALTH SERVICES ADMINISTRATION & MANAGEMENT, Quality in health care < HEALTH SERVICES ADMINISTRATION & MANAGEMENT                                                                                                                                                                                                                                                 |
|                                 |                                                                                                                                                                                                                                                                                                                                                                                                                                               |

SCHOLARONE™  
Manuscripts



I, the Submitting Author has the right to grant and does grant on behalf of all authors of the Work (as defined in the below author licence), an exclusive licence and/or a non-exclusive licence for contributions from authors who are: i) UK Crown employees; ii) where BMJ has agreed a CC-BY licence shall apply, and/or iii) in accordance with the terms applicable for US Federal Government officers or employees acting as part of their official duties; on a worldwide, perpetual, irrevocable, royalty-free basis to BMJ Publishing Group Ltd ("BMJ") its licensees and where the relevant Journal is co-owned by BMJ to the co-owners of the Journal, to publish the Work in this journal and any other BMJ products and to exploit all rights, as set out in our [licence](#).

The Submitting Author accepts and understands that any supply made under these terms is made by BMJ to the Submitting Author unless you are acting as an employee on behalf of your employer or a postgraduate student of an affiliated institution which is paying any applicable article publishing charge ("APC") for Open Access articles. Where the Submitting Author wishes to make the Work available on an Open Access basis (and intends to pay the relevant APC), the terms of reuse of such Open Access shall be governed by a Creative Commons licence – details of these licences and which [Creative Commons](#) licence will apply to this Work are set out in our licence referred to above.

Other than as permitted in any relevant BMJ Author's Self Archiving Policies, I confirm this Work has not been accepted for publication elsewhere, is not being considered for publication elsewhere and does not duplicate material already published. I confirm all authors consent to publication of this Work and authorise the granting of this licence.

# A Study on the Efficiency and Scale Effect of County Public Hospitals in Shandong Province, China

Qian Li<sup>1</sup>, Liqi Tian<sup>1</sup>, Xiaolin Jing<sup>1</sup>, Xianghua Chen<sup>1</sup>, Jiangfeng Li<sup>1</sup>, Huixin Chen<sup>2</sup>

## Author affiliations

1. The Affiliated Hospital of Qingdao University, Qingdao, Shandong province, People's Republic of China

2. Department of Social Medicine and Health Management, School of Medicine, Qingdao University, Qingdao, Shandong province, People's Republic of China

## Correspondence to

Dr Li-qi Tian; tlq1738@sina.com

## Abstract

**Objective:** To evaluate the efficiency of county-level public hospitals in Shandong Province following China's new medical reform and to compare the efficiency of hospitals with different bed size.

**Design and setting:** This was a cross-sectional study on the efficiency and size of 68 county-level public hospitals in China in 2017.

**Outcome measures:** Data envelopment analysis (DEA) was used to calculate the efficiency scores of hospitals and to analyse the slack values of inefficient hospitals. The actual number of open beds, doctors and nurses and total expenditure were selected as inputs, and the total number of annual visits and discharges and total income were selected as outputs. The Kruskal-Wallis H test was employed to compare the efficiency of hospitals with different bed size. The Chi-square ( $\chi^2$ ) test was used to compare the returns to scale (RTS) of hospitals with different bed size.

**Results:** Twenty (29.41%) hospitals were efficient. There were 27 hospitals with increasing returns to scale (IRS), 23 hospitals with constant returns to scale (CRS), and 18 hospitals with decreasing returns to scale (DRS). The differences in technical efficiency (TE,  $P=0.248$ ,  $P>0.05$ ) and pure technical efficiency (PTE,  $P=0.073$ ,  $P>0.05$ ) were not statistically significant. However, the differences in scale efficiency (SE,  $P=0.047$ ,  $P<0.05$ ) and returns to scale ( $P<0.001$ ) were statistically significant. Hospitals with DRS began to appear at 885 beds.



1  
2  
3  
4 All sample hospitals with more than 1100 beds were already saturated, and some hospitals  
5 even had a negative scale effect.  
6

7 **Conclusions:** The government and hospital managers should strictly control the bed size in  
8 hospital and make hospitals resume operating in the interests of public welfare. Interventions  
9 that rationally allocate and use health resources and improve the efficiency of doctors and  
10 nurses are conducive to solving redundant inputs and insufficient outputs.  
11  
12  
13  
14

### 15 **Strengths and limitations of this study**

16  
17 The DEA accommodated multiple inputs and multiple outputs, which is in line with the  
18 characteristics of hospitals.  
19

20  
21 The DEA did not need to use a common denominator, ensuring the diversity of indicators.  
22

23 This study determined the extent and source of hospital inefficiencies to help hospitals take  
24 remedial measures.  
25

26  
27 The results produced by the DEA were sensitive to measurement errors and may  
28 underestimate or overestimate the efficiency scores.  
29

30  
31 Due to the objective limitations of the data, the study included hospitals only in eastern China.  
32

### 33 **Introduction**

34  
35 The unreasonable allocation and utilization of resources have seriously affected the  
36 production efficiency of health services.<sup>1</sup> Pursuing efficiency is of vital importance to  
37 policy-makers and hospital managers.<sup>2</sup> Evaluating of hospital efficiency can help hospital  
38 policy-makers improve inefficiencies with rational policies, and managers can know whether  
39 medical resources are optimally allocated and fully utilized.  
40  
41  
42  
43  
44

45  
46 The focus of medical reform in China has been on hospital efficiency and quality. Prior  
47 studies held that the efficiency of hospitals needed to be further improved, and there were  
48 some problems such as the inefficient allocation of resources and the blind expansion of  
49 scale.<sup>3,4</sup> In 2016, with regard to the healthcare sector, the “Guiding Principles for the Planning  
50 of Medical Institutions (2016-2020)” were issued; these principles required hospitals to  
51 strictly control the bed size. Unfortunately, there has been no significant effect. In fact, in  
52 most hospitals, the number of beds is still on the rise. The price of medical services in China  
53 is regulated by the government, and the zero-price gap policy for drugs and consumables has  
54  
55  
56  
57  
58  
59  
60

1  
2  
3  
4 severely curtailed the sources of hospital revenue. Although it is a public hospital,  
5 government investment is insufficient to meet the needs of hospital development. The  
6 expansion of scale can attract more health resources and financial investment for hospitals,  
7 and it can also reduce the unit cost. Therefore, the benefits of hospital expansion in China are  
8 compelling. Of course, the reasons for expansion do not rule out the increase in demand for  
9 health services.  
10  
11  
12  
13  
14

15 Unexpectedly, the number of beds in the largest public hospital in China has reached 10000.  
16 Is it the case that the more hospital beds there are, the better the hospital's efficiency? Most  
17 studies on scale efficiency (SE) have focused on analysing the appropriate use of resources<sup>5 6</sup>  
18 and estimating the optimal size of hospitals.<sup>7-9</sup> Novosadova et al<sup>10</sup> compared the efficiency of  
19 large and small acute hospitals and gave scores in terms of technical and scale efficiency. It  
20 turned out that smaller hospitals tend to be more efficient than larger ones. Fidler et al<sup>11</sup>  
21 examined the size effect of reorganized hospitals in Austria and Estonia. Policy-makers  
22 believed that the combined large hospitals can reduce average costs and improve clinical  
23 outcomes. In contrast, employees argued that the merger neither generated economies of scale  
24 nor significantly improved quality. In short, regardless of whether hospitals are in China or  
25 elsewhere, conducting studies on hospital efficiency and scale economies is crucial to address  
26 the question of the optimal productive size and to manage a fair allocation of resources.<sup>12</sup>  
27  
28  
29  
30  
31  
32  
33  
34  
35  
36  
37  
38

39 General hospitals have always been the pioneer in the reform of county public hospitals,  
40 and the primary carrier for the government to provide basic medical services to residents  
41 living in counties. Shandong Province, located in eastern China, is one of the major coastal  
42 provinces in China. It is also a populous province. At the end of 2017, the total residential  
43 population reached more than 100 million. Shandong Province took the lead in starting a  
44 comprehensive reform of county public hospitals, and played an exemplary role for the  
45 country as a whole. Therefore, this province is representative for evaluating the efficiency of  
46 county public hospitals and exploring scale effect by taking county public general hospitals in  
47 Shandong Province as a sample. We anticipate that this study will provide a reference for  
48 other regions in regard to efficiency evaluation and scale development.  
49  
50  
51  
52  
53  
54  
55  
56  
57

## 58 **Methods**

59  
60

## Sample and variable selection

The data set was collected from the health statistics information reporting system of the Hospital Management Research Institute of Qingdao University and was provided by 71 county public hospitals from March to June 2018. First, DEA premised on the selection of similar decision-making units; thus, the sample consists of county public general hospitals. Second, all no variables in the sample hospitals should include missing or abnormal values. Third, this study selected counties with one and only one general hospital. Two hospitals were removed for missing data. Another hospital was removed because the district it belonged to was merged. Therefore, combining the above requirements, the study finally identified 68 hospitals.

The study selected seven input and output variables that fit the characteristics of hospital efficiency. The actual number of open beds, the number of doctors, the number of nurses, and total expenditure were used as inputs, to represent human, financial and material resources. The total number of annual visits, the number of discharges, and total income were used as outputs to represent the quantity, quality and benefits of medical services. The variables were determined under the guidance of several previous empirical studies.<sup>13-17</sup> The calculation process was implemented by means of DEAP 2.1 software. The specific indicators are explained in Table 1.

Table 1 Definition of the inputs and outputs

| Category | Variable                      | Definition                                                      |
|----------|-------------------------------|-----------------------------------------------------------------|
| Inputs   | Actual number of open beds    | The number of beds actually opened at the end of the year.      |
|          | Number of doctors             | The number of practising (assistant) physicians.                |
|          | Number of nurses              | The number of qualified nurse practitioners.                    |
|          | Total expenditure             | The expenses incurred by the hospital at the end of the year.   |
| Outputs  | Total number of annual visits | The number of visits, counted by the number of registrations.   |
|          | Number of discharges          | The number of all discharged patients after hospitalization.    |
|          | Total income                  | The total income earned by the hospital at the end of the year. |

## Efficiency evaluation methods

Currently, the evaluation of hospital efficiency focuses on the use of economic models.<sup>18 19</sup> Stochastic frontier analysis (SFA) and the technique for order preference by similarity to an ideal solution (TOPSIS) are also commonly used in efficiency evaluation.<sup>20 21 22</sup> SFA is limited to evaluating the objects of multiple- inputs and a single- output. Although absolute

1  
2  
3  
4 efficiency can be measured, the ability to distinguish allocation efficiency from technical  
5  
6 efficiency is weak.<sup>6</sup> With the TOPSIS method, the weight of the indexes is subjective, which  
7  
8 may affect the accuracy of the results.<sup>22</sup> International studies have shown that data  
9  
10 envelopment analysis (DEA) is an important tool in evaluating hospital efficiency.<sup>23-25</sup> DEA is  
11  
12 a mature and advanced non- parametric method that compensates for the shortcomings of the  
13  
14 above methods. It can solve problems with multiple- inputs and multiple- outputs. Not only  
15  
16 can efficiency be evaluated and ranked, but the source of inefficient decision making units  
17  
18 (DMUs) and the extent of improvement can also be further tracked.<sup>13 19</sup>

### 19 **Data envelopment analysis**

20  
21 Data envelopment analysis is an evaluation method that was first proposed by the famous  
22  
23 American operations researcher A.Charnes and scholar W.W.Cooper in 1978 <sup>23 26</sup> based on  
24  
25 the concept and connotation of relative efficiency.<sup>27</sup> CCR and BCC are the most commonly  
26  
27 used models.<sup>2</sup> In this study, a two-stage DEA was used to conduct research using the CCR  
28  
29 and BCC models of the output-oriented model. The output-oriented model involves how to  
30  
31 increase or maximize output without changing the proportion of input.<sup>17 23</sup> Based on the  
32  
33 assumption of a constant return to scale (CRS), Charnes <sup>28</sup> extended and developed the  
34  
35 DEA-CCR, which is mainly used to measure the TE score of DMUs. A score equal to 1  
36  
37 indicates that the DMU is efficient. A score of less than 1 indicates that the DMU is  
38  
39 inefficient.

$$40$$

$$41 \left( D_{CCR} \right) \begin{cases} \max \phi \\ \sum_{j=1}^n x_j \lambda_j \leq x_0 \\ \sum_{j=1}^n y_j \lambda_j \geq \phi y_0 \\ \lambda_j \geq 0, j = 1, 2, \dots, n \end{cases}$$

$$42$$

$$43$$

$$44$$

$$45$$

$$46$$

$$47$$

$$48$$

$$49$$

$$50 x_j = (x_{1j}, x_{2j}, \dots, x_{mj})^T > 0, y_j = (y_{1j}, y_{2j}, \dots, y_{sj})^T > 0,$$

$$51 x_0 = x_{j_0}, y_0 = y_{j_0}, 1 \leq j_0 \leq n$$

$$52$$

$$53$$

54 The scholars then developed the BCC model based on variable return to scale (VRS) to  
55  
56 separate pure technical efficiency (PTE) from scale efficiency (SE).<sup>29</sup> The BCC model mainly  
57  
58 measures the PTE and SE of the DMU.<sup>30</sup> The BCC model is an extension of the CCR model.  
59  
60

$$(D_{BCC}) \begin{cases} \min \phi \\ \sum_{j=1}^n x_j \lambda_j \leq x_0 \\ \sum_{j=1}^n y_j \lambda_j \geq \phi y_0 \\ \sum_{j=1}^n \lambda_j = 1 \\ \lambda_j \geq 0, j = 1, 2, \dots, n \end{cases}$$

$$x_j = (x_{1j}, x_{2j}, \dots, x_{mj})^T > 0, y_j = (y_{1j}, y_{2j}, \dots, y_{sj})^T > 0,$$

$$x_0 = x_{j0}, y_0 = y_{j0}, 1 \leq j_0 \leq n$$

## Statistical methods

This study defined the size of hospitals based on the actual number of open beds. The sample hospitals are divided into four groups: 500 beds and below, 501-1000 beds, 1001-1500 beds and 1501 beds and above. The Kruskal-Wallis H non-parametric test was used to compare the efficiency of hospitals with different bed size. Efficiency included technical efficiency (TE), pure technical efficiency (PTE), and scale efficiency (SE). The Chi-square ( $\chi^2$ ) test was used to compare the differences in the returns to scale of hospitals with different bed size. Statistical analysis was performed using SPSS 25.0.

## Results

### Description of the inputs and outputs

Table 2 is a descriptive summary of the inputs and outputs of the 68 sample hospitals. The data indicate that the average number of open beds per hospital was 991.0 in 2017. The average number of doctors and nurses per hospital was 352.7 and 529.3 respectively. With an average of 527,816.1 visits per hospital per year, the efficiency of the hospitals was commendable.

Table 2 Descriptive statistics of inputs and outputs

| Indicators                       | Minimum | Maximum   | Average  | SD       |
|----------------------------------|---------|-----------|----------|----------|
| <b>Inputs</b>                    |         |           |          |          |
| Actual number of open beds       | 185.0   | 2220.0    | 991.0    | 373.6    |
| Number of doctors                | 101.0   | 670.0     | 352.7    | 126.3    |
| Number of nurses                 | 149.0   | 971.0     | 529.3    | 191.5    |
| Total expenditure (ten thousand) | 8184.0  | 90030.0   | 41587.8  | 17910.3  |
| <b>Outputs</b>                   |         |           |          |          |
| Total number of annual visits    | 87116.0 | 1511751.0 | 527816.1 | 257916.2 |
| Number of discharges             | 8689.0  | 99565.0   | 43127.6  | 17099.7  |

|                             |        |         |         |         |
|-----------------------------|--------|---------|---------|---------|
| Total income (ten thousand) | 8133.3 | 91991.0 | 42958.6 | 18356.4 |
|-----------------------------|--------|---------|---------|---------|

### Hospital efficiency scores from the DEA

Table 3 shows the distribution of the efficiency scores for the sample hospitals. Only 20 (29.41%) hospitals had TE showing 100% efficient, and 48 (70.59%) hospitals were inefficient. The PTE of 26 (38.24%) hospitals was efficient, while the remaining 42 (61.76%) were inefficient. All hospitals had scale efficiency scores above 0.900, but only 23 (33.82%) were fully efficient. The efficiency score of all sample hospitals are shown in Appendix 1.

Table 3 Distribution of the efficiency scores for the sample hospitals

| Scoring range \ Efficiency | 1.000       | 0.999-0.900 | 0.899-0.800 | 0.799-0.700 |
|----------------------------|-------------|-------------|-------------|-------------|
| Technical efficiency       | 20 (29.41%) | 32 (47.06%) | 15 (22.06%) | 1 (1.47%)   |
| Pure technical efficiency  | 26 (38.24%) | 30 (44.12%) | 11 (16.18%) | 1 (1.47%)   |
| Scale efficiency           | 23 (33.82%) | 45 (66.18%) | 0 (0.00%)   | 0 (0.00%)   |

### Slack value of the inputs and outputs of inefficient hospitals

This study analysed the slack values of 48 inefficient hospitals. In other words, the differences between the actual value and the ideal value of the variables were calculated. Taking hospital H16 as an example, the actual number of doctors in hospital H16 was 38.83 more than the ideal number. As shown in Table 4, hospital H16 needs to increase the total number of visits by 15%, the number of discharges by 6% and total income by 6% to make full use of its current resources.

Table 4 The slack value of the inputs and outputs of hospital H16

| DMU | Related indicators | Inputs |         |        |             | Outputs   |            |          |
|-----|--------------------|--------|---------|--------|-------------|-----------|------------|----------|
|     |                    | Beds   | Doctors | Nurses | Expenditure | Visits    | Discharges | Income   |
| H16 | Actual value       | 717.0  | 300.0   | 344.0  | 27508.0     | 418402.0  | 35536.0    | 28743.0  |
|     | Ideal value        | 717.0  | 261.2   | 344.0  | 27508.0     | 479793.2  | 37800.8    | 30574.8  |
|     | Slack value        | 0.00   | 38.83   | 0.00   | 0.00        | -61391.24 | -2264.77   | -1831.84 |
|     | Change ratio       | 0%     | 13%     | 0%     | 0%          | -15%      | -6%        | -6%      |

### Differences in TE, PTE and SE among hospitals with different bed size

There were no significant differences in TE ( $P=0.248$ ,  $P>0.05$ ) and PTE ( $P=0.073$ ,  $P>0.05$ ) among the four comparison groups. However, the difference in SE was statistically significant ( $P=0.047$ ,  $P<0.05$ ). See Table 5 for details.

Table 5 Statistical analysis results of the efficiency of hospitals with different bed size

| Efficiency           | Bed size        | $\bar{X}\pm S$    | $\chi^2$ value | $P$ value |
|----------------------|-----------------|-------------------|----------------|-----------|
| Technical efficiency | $\leq 500$ beds | 0.965 $\pm$ 0.049 | 4.131          | 0.248     |
|                      | 501-1000 beds   | 0.927 $\pm$ 0.064 |                |           |

|                           |                |             |        |       |
|---------------------------|----------------|-------------|--------|-------|
|                           | 1001-1500 beds | 0.957±0.045 |        |       |
|                           | ≥1501 beds     | 0.930±0.046 |        |       |
| Pure technical efficiency | ≤500 beds      | 0.983±0.031 | 6.954  | 0.073 |
|                           | 501-1000 beds  | 0.934±0.060 |        |       |
|                           | 1001-1500 beds | 0.967±0.041 |        |       |
|                           | ≥1501 beds     | 0.979±0.037 |        |       |
| Scale efficiency          | ≤500 beds      | 0.989±0.022 | 10.321 | 0.047 |
|                           | 501-1000 beds  | 0.992±0.011 |        |       |
|                           | 1001-1500 beds | 0.989±0.013 |        |       |
|                           | ≥1501 beds     | 0.951±0.032 |        |       |

### Differences in returns to scale among hospitals with different bed size

The finding in Table 6 suggests that the difference in the RTS of hospitals with different bed size was significant ( $P<.001$ ). Twenty-three hospitals with the scale efficiency score equal to 1 were CRS. This means that these hospitals not only had the optimal bed size, but also had the lowest operation costs; additionally, their inputs and outputs were in balance. The inefficient hospitals were divided into two categories: IRS and DRS. The 27 hospitals with IRS had insufficient inputs and needed to expand their scale to achieve better results. The 18 hospitals with DRS had redundant inputs and needed to scale down and optimize their allocation of resources.

Table 6 Statistical analysis results of the returns to scale of hospitals with different bed sizes

| Returns to scale<br>Bed size | Returns to scale |             |             | Total     | $\chi^2$ value | P value |
|------------------------------|------------------|-------------|-------------|-----------|----------------|---------|
|                              | DRS              | CRS         | IRS         |           |                |         |
| ≤500 beds                    | 2 (50%)          | 2 (50%)     | 0 (0%)      | 4 (100%)  | 32.023         | <.001   |
| 501-1000 beds                | 23 (63.89%)      | 11 (30.56%) | 2 (5.56%)   | 36 (100%) |                |         |
| 1001-1500 beds               | 2 (8.70%)        | 9 (39.13%)  | 12 (52.17%) | 23 (100%) |                |         |
| ≥1501 beds                   | 0 (0%)           | 1 (20%)     | 4 (80%)     | 5 (100%)  |                |         |
| Total                        | 27               | 23          | 18          | 68        |                |         |

A scatter plot was produced to highlight the relationship between bed size and scale efficiency and returns to scale. As depicted in Figure 1, with the increase in the number of hospital beds, the scale efficiency of hospitals approximately first increased and then decreased. It was obvious that only one hospital was efficient in the ≥1501 bed group, and the remaining four hospitals were not only inefficient, but also had a low scale efficiency score.

In addition, hospitals with DRS began to appear at 885 beds. A large number of hospitals in the 1001-1500 and ≥1501 bed groups already in DRS. Of the 11 hospitals with more than 1300 beds, 9 (81.8%) were DRS. When the bed size exceeded 1100, there were no longer

1  
2  
3  
4 hospitals with IRS. All sample hospitals with more than 1100 beds were already saturated,  
5  
6 and some hospitals even had a negative scale effect.  
7  
8

9  
10  
11  
12  
13  
14  
15  
16  
17  
18  
19  
20  
21  
22  
23  
24  
25  
26  
27  
28  
29  
30  
31  
32  
33  
34  
35  
36  
37  
38  
39  
40  
41  
42  
43  
44  
45  
46  
47  
48  
49  
50  
51  
52  
53  
54  
55  
56  
57  
58  
59  
60  
Figure 1 Scatter plot of the relationship between bed size and scale efficiency and returns to scale

## Discussion

An increasing number of countries have been using DEA to evaluate hospital efficiency.<sup>2 14 18</sup>

<sup>31</sup> The findings indicated that 48 sample hospitals were inefficient. That is, more than 70% of hospitals had problems of excessive inputs or insufficient outputs, which is consistent with the findings of many experts.<sup>1 32 33</sup> Zhaohui Cheng, et al<sup>32</sup> suggested that only 8.8% of the 114 county hospitals in Henan Province, China, were defined as technically efficient, indicating the need to improve efficiency. Moreover, our study found that the outputs of inefficient hospitals had a high slack value, largely because of underutilized resources. In their research on the equity and efficiency of health resource allocation in mainland China, Zhang Yue, et al<sup>34</sup> pointed out that many provinces in China had problems of idle and underutilized health resources. This may be due to the inefficient use of resources by medical staff. It may also be because county hospitals are limited by their own service capabilities, resulting in a loss of patients, which in turn makes resources idle and difficult to use efficiently.

The blind expansion of bed size is a common problem in Chinese hospitals.<sup>35</sup> In theory, due to economies of scale, more beds should result in higher efficiency score. However, the results did not prove that the scale difference in hospital technical efficiency was significant. This may be because the effect of bed size on technical efficiency is not obvious or the difference depends on a combined effect incorporating other factors. To some extent, the level of GDP per capita represents the purchasing power of the government. As a public welfare undertaking led by the government, the development of hospitals cannot be separated from the support of the government. In recent years, the government has reduced the supply of resources to hospitals with DRS by imposing reasonable controls on hospital construction and the purchase of large equipment.<sup>36</sup> Asmild M et al<sup>37</sup> used DEA to study the optimal size of hospitals, especially the relationship between efficiency and size, and indicated that different hospitals had different efficiencies that depended on location, the population served, and the policies that provincial governments wish to implement.



1  
2  
3  
4 The difference in PTE was not significant. It can be speculated that the siphon effect of  
5 scale on medical technology and equipment has been alleviated. In the future, regardless of  
6 the size of the hospital, medical technology and equipment will gradually achieve fairness and  
7 homogeneity. This will be a good vision for future hospital development. The hospitals scored  
8 higher on PTE, with an average score of 0.951. Shandong Province and other areas of China  
9 have given strong support and attention to the investment and renewal of medical equipment,  
10 the strengthening of hospital information systems<sup>38</sup> and the connection of internet hospitals.  
11 Excluding the impact of scale factors, hospitals have produced better improvements in  
12 efficiency through pure technology.  
13  
14  
15  
16  
17  
18  
19  
20

21 This study found that the bed size will affect the SE and RTS of hospitals. Below a critical  
22 range, an increase in the number of beds can lead to an increase in efficiency, but beyond the  
23 threshold, the increase will result in a decrease in efficiency. The findings indicate that  
24 hospitals with DRS began to appear at 885 beds. A large number of hospitals in the  
25 1001-1500 and  $\geq 1501$  bed groups were already in DRS. However, Siping Dong stated that the  
26 vast majority of county hospitals in Hubei Province had more than 335 beds, and were  
27 generally in a state of DRS.<sup>39</sup> The results of Siping Dong's study and our study were quite  
28 different. Over time, the difference may be related to different factors such as the population  
29 base of different provinces and the unleashing of medical service demand due to the  
30 expansion of China's medical insurance coverage.  
31  
32  
33  
34  
35  
36  
37  
38  
39  
40

41 Internationally, several articles in business and economics journals focused on evaluating  
42 the benefits of hospital scale have shown that the IRS appears in hospitals with 300 and 600  
43 beds.<sup>40 41</sup> Banker RD<sup>42</sup> observed that increasing returns to scale could be exploited up to a  
44 capacity of approximately 200 beds. Our study concluded that IRS should be controlled  
45 below 1100 beds. The scale effect of all sample hospitals with more than 1100 beds was  
46 already saturated, and some hospitals even had a negative scale effect. Research undertaken in  
47 the USA and the United Kingdom has indicated that diseconomies of scale can be expected to  
48 occur below approximately 200 beds and above 600 beds.<sup>12 43</sup> Weaver M and Deolalikar A<sup>9</sup>  
49 concluded that economies of scale depend on the type of hospital, as well as the number of  
50 beds and outputs in research on the scale economies of 654 Vietnamese public hospitals.  
51 Specifically, central general hospitals had constant returns to scale when the average number  
52  
53  
54  
55  
56  
57  
58  
59  
60

1  
2  
3  
4 of beds was 516. China is a country with a large population, and its demand for medical  
5 services is higher than that of other countries. The health sector has been implementing a  
6 hierarchical diagnosis and treatment model, and striving to make the county hospital visit rate  
7 90% by 2020. The interval of beds for IRS in county public hospitals may be broader than  
8 that in other countries.  
9

### 13 **Limitations**

15 This study evaluated the efficiency of county public hospitals in Shandong Province  
16 following the new medical reform, and explored the influence of scale on hospital efficiency.  
17 It provides a reference for the government and hospitals to reasonably control bed size, and it  
18 offers a warning to hospitals with regard to blindly expanding. However, the study has several  
19 limitations. First, the sample hospitals were selected from Shandong Province in eastern  
20 China, while hospitals located in central and western areas were excluded. Second, the data in  
21 this study cover only 2017, and cannot form panel data, leading to a lack of longitudinal  
22 analysis and comparison. Bias adjustments of efficiency scores were not carried out due to  
23 limitation of the DEA approach. In the future, we will continue to track the efficiency of  
24 county-level public hospitals in Shandong Province  
25  
26  
27  
28  
29  
30  
31  
32  
33  
34

### 35 **Conclusions**

37 This study evaluated and compared the efficiency of 68 county public hospitals in Shandong  
38 Province using DEA. The hospitals had higher efficiency scores, but most hospitals had  
39 problems of an unreasonable allocation and inadequate utilization of health resources.  
40 Hospitals should mobilize the enthusiasm of medical staff and continuously improve human  
41 efficiency. The synergy between human efficiency and pure technical efficiency will lead to  
42 higher efficiency in hospitals.  
43  
44  
45  
46  
47  
48

49 This study further demonstrated that blindly expanding the bed size does not lead to greater  
50 hospital efficiency. County public hospitals should avoid blindly expanding their scale and  
51 should take various effective measures to improve their efficiency. As a main body serving  
52 county residents, hospitals should accurately determine their service content based on their  
53 function of the hospital, the medical service demand categories of residents within their  
54 jurisdiction, and the number and structure of the population being served. We hope that this  
55  
56  
57  
58  
59  
60

study will provide a reference for other regions to evaluate efficiency and control scale.

## Acknowledgement

We would like to thank 71 county public hospitals for their cooperation and provide us with true hospital data. We are very pleased with all the staff of the Hospital Management Research Institute of Qingdao University. They are very enthusiastic about the aggregation and cleaning of the data of 71 hospitals, so that we have an intuitive understanding of the data. Thanks to Xiaolin Jing for giving me a lot of guidance on the writing of the thesis and the correction of the grammar.

**Contributors** LT and JL contributed to the conceptualization and design of the research. XC and HC spared no effort to collect and standardize data. QL and XC contributed to the analysis and interpretation of the data and provided statistical analysis support. XJ gave guidance on the writing of the article. QL drafted the article. All authors critically revised the manuscript and eventually approved the version to be released.

**Funding** The authors have not declared a specific grant for this research from any funding agency.

**Competing interests** None declared.

**Patient and public involvement** No patient involved

**Ethics approval** An ethics statement for this study was approved by the Ethics Committee of the Affiliated Hospital of Qingdao University prior to the start of the study.

**Provenance and peer review** Not commissioned; externally peer reviewed.

**Data availability statement** The authors will not share the data for this work. The data for this study was obtained by applying to the Institute of Hospital Management of Qingdao University and involved private information such as hospital financial data.

## References

1. Sun J, Luo H. Evaluation on equality and efficiency of health resources allocation and health services utilization in China. *International journal for equity in health* 2017;**16**(1):127 doi: 10.1186/s12939-017-0614-y [published Online First: Epub Date].
2. Jia T, Yuan H. The application of DEA (Data Envelopment Analysis) window analysis in the

- assessment of influence on operational efficiencies after the establishment of branched hospitals. *BMC health services research* 2017;**17**(1):265 doi: 10.1186/s12913-017-2203-6[published Online First: Epub Date]].
- 3.Feng JH. Study on the Change of Operation Efficiency of County Public Hospitals in Chenzhou City [M]. University Of Nanhua, 2017.
- 4.Li JM, Yao JW, LU J, et al. Analysis of medical service efficiency of county-level public hospitals in Gansu province based on DEA model. *Health Soft Science* 2019;**33**(04):61-65
- 5.Kirigia JM, Emrouznejad A, Cassoma B, et al. A performance assessment method for hospitals: the case of municipal hospitals in Angola. *Journal of medical systems* 2008;**32**(6):509-19 doi: 10.1007/s10916-008-9157-5[published Online First: Epub Date]].
- 6.Varabyova Y, Schreyogg J. International comparisons of the technical efficiency of the hospital sector: panel data analysis of OECD countries using parametric and non-parametric approaches. *Health policy* 2013;**112**(1-2):70-9 doi: 10.1016/j.healthpol.2013.03.003[published Online First: Epub Date]].
- 7.Azevedo H, Mateus C. Cost effects of hospital mergers in Portugal. *The European journal of health economics : HEPAC : health economics in prevention and care* 2014;**15**(9):999-1010 doi: 10.1007/s10198-013-0552-6[published Online First: Epub Date]].
- 8.Kristensen T, Bogetoft P, Pedersen KM. Potential gains from hospital mergers in Denmark. *Health care management science* 2010;**13**(4):334-45 doi: 10.1007/s10729-010-9133-8[published Online First: Epub Date]].
- 9.Weaver M, Deolalikar A. Economies of scale and scope in Vietnamese hospitals. *Social science & medicine (1982)* 2004;**59**(1):199-208 doi: 10.1016/j.socscimed.2003.10.014[published Online First: Epub Date]].
- 10.Novosadova I, Dlouhy M. Evaluation of technical efficiency of acute hospitals and its relation to wages of health personnel. *Ekonomicky Casopis* 2007;**55**(8):783-92
- 11.Fidler AH, Haslinger RR, Hofmarcher MM, et al. Incorporation of public hospitals: a "silver bullet" against overcapacity, managerial bottlenecks and resource constraints? Case studies from Austria and Estonia. *Health policy* 2007;**81**(2-3):328-38 doi: 10.1016/j.healthpol.2006.06.007[published Online First: Epub Date]].
- 12.Giancotti M, Guglielmo A, Mauro M. Efficiency and optimal size of hospitals: Results of a systematic search. *PloS one* 2017;**12**(3):e0174533 doi: 10.1371/journal.pone.0174533[published Online First: Epub Date]].
- 13.Sultan WIM, Crispim J. Measuring the efficiency of Palestinian public hospitals during 2010-2015: an application of a two-stage DEA method. *BMC health services research* 2018;**18**(1):381 doi: 10.1186/s12913-018-3228-1[published Online First: Epub Date]].
- 14.Du J, Wang J, Yao C, et al. Incorporating health outcomes in Pennsylvania hospital efficiency: an additive super-efficiency DEA approach. *Annals of Operations Research* 2014;**221**(1):161-72
- 15.Kjekshus L, Hagen T. Do hospital mergers increase hospital efficiency? Evidence from a National Health Service country. *Journal of health services research & policy* 2007;**12**(4):230-5 doi: 10.1258/135581907782101561[published Online First: Epub Date]].
- 16.Afonso A, Fernandes S. Assessing Hospital Efficiency: Non-Parametric Evidence for Portugal. *SSRN Electronic Journal*
- 17.Li H, Dong S, Liu T. Relative efficiency and productivity: a preliminary exploration of public hospitals in Beijing, China. *BMC health services research* 2014;**14**:158 doi:

- 10.1186/1472-6963-14-158[published Online First: Epub Date]].
18. Osei D, d'Almeida S, George MO, et al. Technical efficiency of public district hospitals and health centres in Ghana: a pilot study. Cost effectiveness and resource allocation : C/E 2005;**3**:9 doi: 10.1186/1478-7547-3-9[published Online First: Epub Date]].
19. Marschall P, Flessa S. Efficiency of primary care in rural Burkina Faso. A two-stage DEA analysis. Health economics review 2011;**1**(1):5 doi: 10.1186/2191-1991-1-5[published Online First: Epub Date]].
20. Goudarzi R, Pourreza A, Shokoohi M, et al. Technical efficiency of teaching hospitals in Iran: the use of Stochastic Frontier Analysis, 1999-2011. International journal of health policy and management 2014;**3**(2):91-7 doi: 10.15171/ijhpm.2014.66[published Online First: Epub Date]].
21. Barros CP, de Menezes AG, Vieira JC. Measurement of hospital efficiency, using a latent class stochastic frontier model. Applied Economics 2013;**45**(1):47-54 doi: 10.1080/00036846.2011.579061[published Online First: Epub Date]].
22. Lei RJ, Li SW, Ji ZH. Comparative study of TOPSIS and RSR in evaluation of hospital bed utilization efficiency. China health status 2019;**36**(03):430-32
23. Marschall P, Flessa S. Assessing the efficiency of rural health centres in Burkina Faso: an application of Data Envelopment Analysis. Journal of Public Health 2009;**17**(2):87
24. Kirigia JM, Sambo LG, Renner A, et al. Technical efficiency of primary health units in Kailahun and Kenema districts of Sierra Leone. International archives of medicine 2011;**4**:15 doi: 10.1186/1755-7682-4-15[published Online First: Epub Date]].
25. Ichoku HE, Fonta WM, Onwujekwe OE, et al. Evaluating the Technical Efficiency of Hospitals in Southeastern Nigeria. Eur J Bus Manag 2011;**3**:24-37
26. Ferreira C, Marques RC, Nicola P. On evaluating health centers groups in Lisbon and Tagus Valley: efficiency, equity and quality. BMC health services research 2013;**13**:529 doi: 10.1186/1472-6963-13-529[published Online First: Epub Date]].
27. Farrell MJ. The Measurement of Productive Efficiency. Journal of the Royal Statistical Society 1957;**120**(3):253-90
28. Charnes A, Clark CT, Cooper WW, et al. A developmental study of data envelopment analysis in measuring the efficiency of maintenance units in the U.S. air forces. Annals of Operations Research 1984;**2**(1):95-112
29. Jacobs R. Alternative methods to examine hospital efficiency: data envelopment analysis and stochastic frontier analysis. Health care management science 2001;**4**(2):103-15
30. Banker RD, Charnes A, Cooper WW. Some Models for Estimating Technical and Scale Inefficiencies in Data Envelopment Analysis. Management Science 1984;**30**(9):1078-92
31. Servan-Mori E, Chivardi C, Mendoza MA, et al. A longitudinal assessment of technical efficiency in the outpatient production of maternal health services in Mexico. Health policy and planning 2018;**33**(8):888-97 doi: 10.1093/heapol/czy074[published Online First: Epub Date]].
32. Cheng Z, Tao H, Cai M, et al. Technical efficiency and productivity of Chinese county hospitals: an exploratory study in Henan province, China. BMJ open 2015;**5**(9):e007267 doi: 10.1136/bmjopen-2014-007267[published Online First: Epub Date]].
33. Wang X, Luo H, Qin X, et al. Evaluation of performance and impacts of maternal and child health hospital services using Data Envelopment Analysis in Guangxi Zhuang Autonomous Region, China: a comparison study among poverty and non-poverty county level hospitals. International journal for equity in health 2016;**15**(1):131 doi: 10.1186/s12939-016-0420-y[published Online

- 1  
2  
3 First: Epub Date]].  
4  
5 34.Zhang Y, Wang Q, Jiang T, et al. Equity and efficiency of primary health care resource allocation in  
6 mainland China. *International journal for equity in health* 2018;**17**(1):140 doi:  
7 10.1186/s12939-018-0851-8[published Online First: Epub Date]].  
8  
9 35.Zhang T. "Finding Reasons" and "Suggestions" for Public Hospital Expansion. *Chinese Hospital*  
10 *Dean* 2017(15):64-67  
11  
12 36.Zhang RH, Liu L, Li WH, et al. Evaluation of medical and health service efficiency in 31 provinces  
13 and municipalities in China based on Data Envelopment Analysis. *China Health Econ*  
14 2011;**30**(02):69-72  
15  
16 37.Asmild M, Hollingsworth B, Birch S. The scale of hospital production in different settings: one size  
17 does not fit all.**40**(2):197-206  
18  
19 38.Zhou WT, Jin CI, Li F, et al. Analysis of operational efficiency of health system in districts and  
20 counties of Shanghai. *Chin Health Stat* 2017;**34**(03):445-47+52  
21  
22 39.Dong SP. Study on the efficiency of scale economy and its influencing factors in county-level  
23 general hospitals [D]. Huazhong University of Science and Technology, 2010.  
24  
25 40.Lothgren M, Tambour M. Testing scale efficiency in DEA models: a bootstrapping approach.  
26 *Applied Economics* 1999;**31**(10):1231-37  
27  
28 41.Wilson PW, Carey K. Nonparametric analysis of returns to scale in the us hospital industry. *Journal*  
29 *of Applied Econometrics* 2004;**19**(4):505-24 doi: 10.1002/jae.801[published Online First: Epub  
30 Date]].  
31  
32 42.Banker RD. Estimating most productive scale size using data envelopment analysis. *European*  
33 *Journal of Operational Research*;17(1):35-44  
34  
35 43.Roh CY, Moon MJ, Jung C. Measuring Performance of U.S. Nonprofit Hospitals. *Public*  
36 *Performance & Management Review* 2010;**34**(1):22-37  
37  
38  
39  
40  
41  
42  
43  
44  
45  
46  
47  
48  
49  
50  
51  
52  
53  
54  
55  
56  
57  
58  
59  
60

1  
2  
3  
4  
5  
6  
7  
8  
9  
10  
11  
12  
13  
14  
15  
16  
17  
18  
19  
20  
21  
22  
23  
24  
25  
26  
27  
28  
29  
30  
31  
32  
33  
34  
35  
36  
37  
38  
39  
40  
41  
42  
43  
44  
45  
46  
47  
48  
49  
50  
51  
52  
53  
54  
55  
56  
57  
58  
59  
60

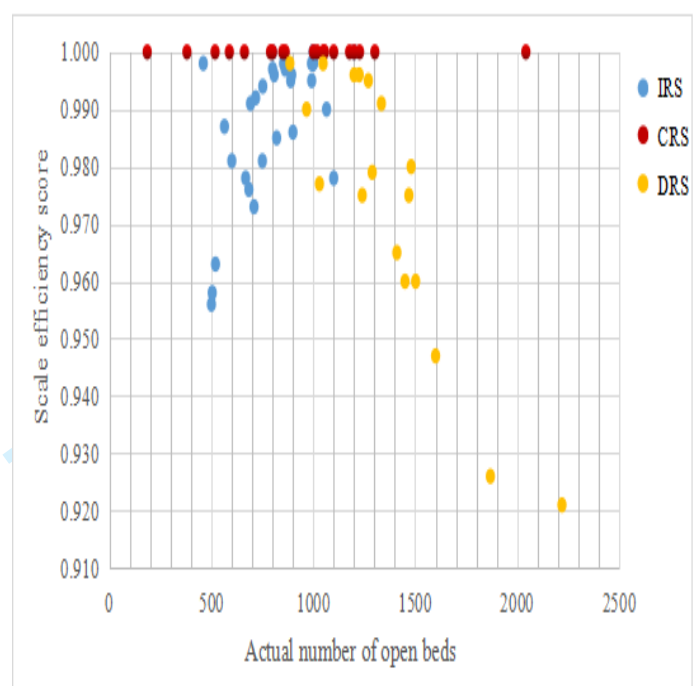

Figure 1 Scatter plot of the relationship between bed size and scale efficiency and returns to scale

## Appendix 1.

## The efficiency scores of all sample hospitals

| DMU | Bed size | TE    | PTE   | SE    | RTS |
|-----|----------|-------|-------|-------|-----|
| H1  | 185      | 1.000 | 1.000 | 1.000 | -   |
| H2  | 380      | 1.000 | 1.000 | 1.000 | -   |
| H3  | 460      | 0.964 | 0.996 | 0.998 | irs |
| H4  | 500      | 0.896 | 0.937 | 0.956 | irs |
| H5  | 504      | 0.878 | 0.917 | 0.958 | irs |
| H6  | 518      | 1.000 | 1.000 | 1.000 | -   |
| H7  | 520      | 0.963 | 1.000 | 0.963 | irs |
| H8  | 564      | 0.902 | 0.914 | 0.987 | irs |
| H9  | 588      | 1.000 | 1.000 | 1.000 | -   |
| H10 | 600      | 0.864 | 0.881 | 0.981 | irs |
| H11 | 662      | 1.000 | 1.000 | 1.000 | -   |
| H12 | 668      | 0.905 | 0.925 | 0.978 | irs |
| H13 | 684      | 0.868 | 0.890 | 0.976 | irs |
| H14 | 692      | 0.977 | 0.985 | 0.991 | irs |
| H15 | 709      | 0.706 | 0.726 | 0.972 | irs |
| H16 | 717      | 0.932 | 0.940 | 0.992 | irs |
| H17 | 750      | 0.853 | 0.870 | 0.981 | irs |
| H18 | 752      | 0.862 | 0.867 | 0.994 | irs |
| H19 | 790      | 1.000 | 1.000 | 1.000 | -   |
| H20 | 800      | 0.954 | 0.957 | 0.997 | irs |
| H21 | 800      | 1.000 | 1.000 | 1.000 | -   |
| H22 | 800      | 1.000 | 1.000 | 1.000 | -   |
| H23 | 808      | 0.907 | 0.910 | 0.996 | irs |
| H24 | 820      | 0.829 | 0.841 | 0.985 | irs |
| H25 | 850      | 1.000 | 1.000 | 1.000 | -   |
| H26 | 854      | 0.925 | 0.926 | 0.998 | irs |
| H27 | 862      | 0.903 | 0.906 | 0.997 | irs |
| H28 | 862      | 1.000 | 1.000 | 1.000 | -   |
| H29 | 885      | 0.887 | 0.889 | 0.998 | drs |
| H30 | 889      | 0.900 | 0.905 | 0.995 | irs |
| H31 | 894      | 0.935 | 0.939 | 0.996 | irs |
| H32 | 900      | 0.919 | 0.932 | 0.986 | irs |
| H33 | 967      | 0.934 | 0.944 | 0.990 | drs |
| H34 | 991      | 0.951 | 0.953 | 0.998 | irs |
| H35 | 992      | 0.866 | 0.871 | 0.995 | irs |
| H36 | 1000     | 0.942 | 0.944 | 0.998 | irs |
| H37 | 1000     | 0.886 | 0.886 | 1.000 | -   |
| H38 | 1000     | 0.975 | 0.978 | 0.998 | irs |
| H39 | 1000     | 0.946 | 0.946 | 1.000 | -   |



|     |      |       |       |       |     |
|-----|------|-------|-------|-------|-----|
| H40 | 1000 | 1.000 | 1.000 | 1.000 | -   |
| H41 | 1018 | 1.000 | 1.000 | 1.000 | -   |
| H42 | 1030 | 0.875 | 0.896 | 0.977 | drs |
| H43 | 1048 | 0.971 | 0.973 | 0.998 | drs |
| H44 | 1050 | 1.000 | 1.000 | 1.000 | -   |
| H45 | 1055 | 0.884 | 0.884 | 1.000 | -   |
| H46 | 1065 | 0.889 | 0.898 | 0.990 | irs |
| H47 | 1100 | 0.977 | 1.000 | 0.977 | irs |
| H48 | 1100 | 1.000 | 1.000 | 1.000 | -   |
| H49 | 1178 | 1.000 | 1.000 | 1.000 | -   |
| H50 | 1200 | 1.000 | 1.000 | 1.000 | -   |
| H51 | 1200 | 0.911 | 0.915 | 0.996 | drs |
| H52 | 1200 | 1.000 | 1.000 | 1.000 | -   |
| H53 | 1225 | 0.936 | 0.940 | 0.996 | drs |
| H54 | 1227 | 1.000 | 1.000 | 1.000 | -   |
| H55 | 1240 | 0.975 | 1.000 | 0.975 | drs |
| H56 | 1270 | 0.976 | 0.981 | 0.995 | drs |
| H57 | 1289 | 0.898 | 0.918 | 0.979 | drs |
| H58 | 1302 | 1.000 | 1.000 | 1.000 | -   |
| H59 | 1334 | 0.991 | 1.000 | 0.991 | drs |
| H60 | 1410 | 0.927 | 0.960 | 0.965 | drs |
| H61 | 1450 | 0.960 | 1.000 | 0.96  | drs |
| H62 | 1469 | 0.921 | 0.944 | 0.975 | drs |
| H63 | 1480 | 0.916 | 0.934 | 0.980 | drs |
| H64 | 1502 | 0.877 | 0.914 | 0.960 | drs |
| H65 | 1600 | 0.943 | 0.996 | 0.947 | drs |
| H66 | 1869 | 0.910 | 0.983 | 0.926 | drs |
| H67 | 2043 | 1.000 | 1.000 | 1.000 | -   |
| H68 | 2220 | 0.921 | 1.000 | 0.921 | drs |

STROBE Statement—Checklist of items that should be included in reports of *cross-sectional studies*

|                           | Item No. | Recommendation                                                                                                                                                                                                                                                                                                                                                                                                                                                                                                                                                                                                                                                                                                                                                                                                                                                                                                                                                                                                                                                                                                                                                                                                                                                                                                                                                                                                                             | Page No. |
|---------------------------|----------|--------------------------------------------------------------------------------------------------------------------------------------------------------------------------------------------------------------------------------------------------------------------------------------------------------------------------------------------------------------------------------------------------------------------------------------------------------------------------------------------------------------------------------------------------------------------------------------------------------------------------------------------------------------------------------------------------------------------------------------------------------------------------------------------------------------------------------------------------------------------------------------------------------------------------------------------------------------------------------------------------------------------------------------------------------------------------------------------------------------------------------------------------------------------------------------------------------------------------------------------------------------------------------------------------------------------------------------------------------------------------------------------------------------------------------------------|----------|
| <b>Title and abstract</b> | 1        | (a) A Study on the Efficiency and Scale Effect of County Public Hospitals in Shandong Province, China                                                                                                                                                                                                                                                                                                                                                                                                                                                                                                                                                                                                                                                                                                                                                                                                                                                                                                                                                                                                                                                                                                                                                                                                                                                                                                                                      | 1        |
|                           |          | (b) Data envelopment analysis (DEA) was used to calculate the efficiency scores of hospitals. Kruskal-Wallis H and Chi-square ( $\chi^2$ ) test were employed to compare the efficiency and returns to scale (RTS) of hospitals with different bed sizes respectively. The study found that the difference of scale efficiency (SE, $P=0.047$ , $P<0.05$ ) and returns to scale (RTS, $P<0.001$ ) were statistically significant. The findings indicated that hospitals with DRS began to appear at 885 beds. All sample hospitals with more than 1100 beds were already saturated, and some hospitals even had a negative scale effect.                                                                                                                                                                                                                                                                                                                                                                                                                                                                                                                                                                                                                                                                                                                                                                                                   | 1        |
| <b>Introduction</b>       |          |                                                                                                                                                                                                                                                                                                                                                                                                                                                                                                                                                                                                                                                                                                                                                                                                                                                                                                                                                                                                                                                                                                                                                                                                                                                                                                                                                                                                                                            |          |
| Background/rationale      | 2        | The unreasonable allocation and utilization of health resources and the blind explosion of hospital scale have seriously affected the production efficiency of health services. In 2016, with regard to the healthcare sector, the “Guiding Principles for the Planning of Medical Institutions (2016-2020)” were issued; these principles required hospitals to strictly control the bed size. Unfortunately, there has been no significant effect. In fact, in most hospitals, the number of beds is still on the rise. Novosadova et al <sup>10</sup> compared the efficiency of large and small acute hospitals and gave scores in terms of technical and scale efficiency. It turned out that smaller hospitals tend to be more efficient than larger ones. Regardless of whether hospitals are in China or elsewhere, conducting studies on hospital efficiency and scale economies is crucial to address the question of the optimal productive size and to manage a fair allocation of resources. In 2015, the comprehensive reform of county public hospitals was fully rolled out in China. The status of hospital efficiency after the reform needs to be evaluated. The relationship between efficiency and bed size is also of great interest to managers. Based on efficiency theory and production theory, data envelopment analysis is used to analyze the efficiency of hospitals and the scale effect of efficiency from | 2-3      |

|                |   |                                                                                                                                                                                                                                                                                                                                                                                                                                                                                                                                                                                                                                                                                                                                                                          |     |
|----------------|---|--------------------------------------------------------------------------------------------------------------------------------------------------------------------------------------------------------------------------------------------------------------------------------------------------------------------------------------------------------------------------------------------------------------------------------------------------------------------------------------------------------------------------------------------------------------------------------------------------------------------------------------------------------------------------------------------------------------------------------------------------------------------------|-----|
|                |   | the inputs and outputs.                                                                                                                                                                                                                                                                                                                                                                                                                                                                                                                                                                                                                                                                                                                                                  |     |
| Objectives     | 3 | To evaluate the efficiency of county public hospitals in Shandong Province after the new medical reform in China and to explore the scale effect.                                                                                                                                                                                                                                                                                                                                                                                                                                                                                                                                                                                                                        | 3   |
| <b>Methods</b> |   |                                                                                                                                                                                                                                                                                                                                                                                                                                                                                                                                                                                                                                                                                                                                                                          |     |
| Study design   | 4 | The study selected seven input and output variables that fit the characteristics of hospital efficiency. The main purpose of the study was to use DEA-CCR and DEA-BBC to evaluate the efficiency of county level public hospitals, and to compare the efficiency of hospitals with different bed size groups. Efficiency included technical efficiency (TE), pure technical efficiency (PTE), and scale efficiency (SE). The Kruskal-Wallis H non-parametric test was used to compare the efficiency of hospitals with different bed size. Efficiency included technical efficiency, pure technical efficiency, and scale efficiency. The Chi-square ( $\chi^2$ ) test was used to compare the differences in the returns to scale of hospitals with different bed size. | 4-6 |
| Setting        | 5 | The data set was collected from the health statistics information reporting system of the Hospital Management Research Institute of Qingdao University and was provided by 71 county public hospitals. The data collection time is from March to June 2018. It is mainly provided by the statisticians of each hospital to the Institute of Hospital Management of Qingdao University through electronic data sheets, and then all the data is consolidated by the Hospital Management Institute.                                                                                                                                                                                                                                                                        | 4   |
| Participants   | 6 | Participants came from 68 county public general hospitals. First, DEA premised on the selection of similar decision-making units; thus, the sample consists of county public general hospitals. Second, all no variables in the sample hospitals should include missing or abnormal values. Third, this study selected counties with one and only one general hospital. Therefore, combining the above requirements, the study finally identified 68 hospitals.                                                                                                                                                                                                                                                                                                          | 4   |
| Variables      | 7 | Variables included 4 inputs and 3 outputs. The study used the actual number of open beds, the number of doctors, the number of nurses, and the total expenditure as inputs, representing the investment in three aspects of human, financial and material resources. The total number of annual visits, the number of                                                                                                                                                                                                                                                                                                                                                                                                                                                    | 4   |

discharges, and the total income were used as outputs to represent the quantity, quality and benefits of medical services. Seven variables were applied to the DEA model to calculate efficiency. We also used the actual number of open beds to explore the impact of bed size on hospital efficiency.

|                           |    |                                                                                                                                                                                                                                                                                                                                                                                                                                                                                                                                                                                                                                                                                                                                                                                                                                  |    |
|---------------------------|----|----------------------------------------------------------------------------------------------------------------------------------------------------------------------------------------------------------------------------------------------------------------------------------------------------------------------------------------------------------------------------------------------------------------------------------------------------------------------------------------------------------------------------------------------------------------------------------------------------------------------------------------------------------------------------------------------------------------------------------------------------------------------------------------------------------------------------------|----|
| Data sources/ measurement | 8* | The data related to the variables are reported personally by the participating hospitals and derived from the Shandong Province Statistical Yearbook of Health. Actual number of open beds measured by the number of beds actually opened at the end of the year. The number of doctors referred to the number of practising (assistant) physicians. The number of nurses referred to the number of qualified nurse practitioners. Total expenditure calculated by the expenses incurred by the hospital at the end of the year. Total number of annual visits measured by the number of visits counted by the number of registrations. Number of discharges measured by the number of all discharges patients after hospitalization. Total income calculated by the total income earned by the hospital at the end of the year. | 4  |
| Bias                      | 9  | Bias adjustments of efficiency scores were not carried out due to limitation of Coelli 's basic DEA approach.                                                                                                                                                                                                                                                                                                                                                                                                                                                                                                                                                                                                                                                                                                                    | 11 |
| Study size                | 10 | Sixty-eight county public general hospitals met the research objectives and inclusion criteria. The sample size is therefore determined.                                                                                                                                                                                                                                                                                                                                                                                                                                                                                                                                                                                                                                                                                         | 4  |
| Quantitative variables    | 11 | The sample hospitals are divided into four groups: 500 beds and below, 501-1000 beds, 1001-1500 beds and 1501 beds and above. The difference of hospital efficiency in different bed size was compared by grouping.                                                                                                                                                                                                                                                                                                                                                                                                                                                                                                                                                                                                              | 6  |
| Statistical methods       | 12 | (a) Kruskal-Wallis H test was used to compare the efficiency of hospitals with different bed sizes.                                                                                                                                                                                                                                                                                                                                                                                                                                                                                                                                                                                                                                                                                                                              | 6  |
|                           |    | (b) The Chi-square ( $\chi^2$ ) test was used to compare the differences in the returns to scale of hospitals with different bed sizes.                                                                                                                                                                                                                                                                                                                                                                                                                                                                                                                                                                                                                                                                                          | 6  |
|                           |    | (c) Study removed samples with missing data or abnormal values.                                                                                                                                                                                                                                                                                                                                                                                                                                                                                                                                                                                                                                                                                                                                                                  | 4  |
| <b>Results</b>            |    |                                                                                                                                                                                                                                                                                                                                                                                                                                                                                                                                                                                                                                                                                                                                                                                                                                  |    |

|    |                  |     |                                                                                                                                                                                                                                                                                                        |
|----|------------------|-----|--------------------------------------------------------------------------------------------------------------------------------------------------------------------------------------------------------------------------------------------------------------------------------------------------------|
| 1  |                  |     |                                                                                                                                                                                                                                                                                                        |
| 2  |                  |     |                                                                                                                                                                                                                                                                                                        |
| 3  |                  |     |                                                                                                                                                                                                                                                                                                        |
| 4  | Participants     | 13* | (a) Participants included 71 county public general hospitals, but 68 hospitals that passed the audit and participated in the final analysis. 4                                                                                                                                                         |
| 5  |                  |     |                                                                                                                                                                                                                                                                                                        |
| 6  |                  |     |                                                                                                                                                                                                                                                                                                        |
| 7  |                  |     | (b) Two hospitals were removed for missing data. Another hospital was removed because the district it belonged to was merged. 4                                                                                                                                                                        |
| 8  |                  |     |                                                                                                                                                                                                                                                                                                        |
| 9  |                  |     |                                                                                                                                                                                                                                                                                                        |
| 10 | Descriptive data | 14* | (a) The participants were county public general hospitals in Shandong Province, which mainly provide medical services to residents in the county. 4                                                                                                                                                    |
| 11 |                  |     |                                                                                                                                                                                                                                                                                                        |
| 12 |                  |     |                                                                                                                                                                                                                                                                                                        |
| 13 |                  |     | (b) A sample hospital without the number of nurse. Another sample hospital without the number of beds. The district to which the third sample hospital belongs was merged. Therefore, the three hospitals was removed. 4                                                                               |
| 14 |                  |     |                                                                                                                                                                                                                                                                                                        |
| 15 |                  |     |                                                                                                                                                                                                                                                                                                        |
| 16 |                  |     |                                                                                                                                                                                                                                                                                                        |
| 17 |                  |     |                                                                                                                                                                                                                                                                                                        |
| 18 | Outcome data     | 15* | The data indicate that the average number of open beds per hospital was 991.0 in 2017. The average number of doctors and nurses per hospital was 352.7 and 529.3 respectively. With an average of 527,816.1 visits per hospital per year, the efficiency of the hospitals was commendable. 6           |
| 19 |                  |     |                                                                                                                                                                                                                                                                                                        |
| 20 |                  |     |                                                                                                                                                                                                                                                                                                        |
| 21 |                  |     |                                                                                                                                                                                                                                                                                                        |
| 22 |                  |     |                                                                                                                                                                                                                                                                                                        |
| 23 |                  |     | Only 20 (29.41%) hospitals which technical efficiency calculated to be 100% efficient, and 48 (70.59%) hospitals were inefficient. 7                                                                                                                                                                   |
| 24 |                  |     |                                                                                                                                                                                                                                                                                                        |
| 25 |                  |     |                                                                                                                                                                                                                                                                                                        |
| 26 |                  |     |                                                                                                                                                                                                                                                                                                        |
| 27 |                  |     | The difference of the technical efficiency (P=0.248, P>0.05) and the pure technical efficiency (P=0.073, P>0.05) were not statistically significant. The difference of scale efficiency (P=0.047, P<0.05) and returns to scale (P<0.001) were statistically significant. 7-8                           |
| 28 |                  |     |                                                                                                                                                                                                                                                                                                        |
| 29 |                  |     |                                                                                                                                                                                                                                                                                                        |
| 30 |                  |     |                                                                                                                                                                                                                                                                                                        |
| 31 | Main results     | 16  | (a) Most of county public hospitals in Shandong Province were inefficient and had problems of excessive inputs or insufficient outputs. 7                                                                                                                                                              |
| 32 |                  |     |                                                                                                                                                                                                                                                                                                        |
| 33 |                  |     |                                                                                                                                                                                                                                                                                                        |
| 34 |                  |     | (b) Bed size had an impact on hospital scale efficiency and returns to scale. 8                                                                                                                                                                                                                        |
| 35 |                  |     |                                                                                                                                                                                                                                                                                                        |
| 36 |                  |     |                                                                                                                                                                                                                                                                                                        |
| 37 |                  |     | (c) With more than 885 beds, hospitals were beginning to enter the decreasing returns to scale. When the bed size exceeded 1100, there were no longer hospitals with IRS. All sample hospitals with more than 1100 beds were already saturated, and some hospitals even had a negative scale effect. 8 |
| 38 |                  |     |                                                                                                                                                                                                                                                                                                        |
| 39 |                  |     |                                                                                                                                                                                                                                                                                                        |
| 40 |                  |     |                                                                                                                                                                                                                                                                                                        |

|                   |    |                                                                                                                                                                                                                                                                                                                                                                                                                                                                                                                                                                                                                                                                                                                                                                                                                                                                                                                                                                                                                                                                                                                                                                                                                                                                                                                                                                                                                                                                                                                                                                                                                                                                                                                                                                                  |    |
|-------------------|----|----------------------------------------------------------------------------------------------------------------------------------------------------------------------------------------------------------------------------------------------------------------------------------------------------------------------------------------------------------------------------------------------------------------------------------------------------------------------------------------------------------------------------------------------------------------------------------------------------------------------------------------------------------------------------------------------------------------------------------------------------------------------------------------------------------------------------------------------------------------------------------------------------------------------------------------------------------------------------------------------------------------------------------------------------------------------------------------------------------------------------------------------------------------------------------------------------------------------------------------------------------------------------------------------------------------------------------------------------------------------------------------------------------------------------------------------------------------------------------------------------------------------------------------------------------------------------------------------------------------------------------------------------------------------------------------------------------------------------------------------------------------------------------|----|
| Other analyses    | 17 | None                                                                                                                                                                                                                                                                                                                                                                                                                                                                                                                                                                                                                                                                                                                                                                                                                                                                                                                                                                                                                                                                                                                                                                                                                                                                                                                                                                                                                                                                                                                                                                                                                                                                                                                                                                             |    |
| <b>Discussion</b> |    |                                                                                                                                                                                                                                                                                                                                                                                                                                                                                                                                                                                                                                                                                                                                                                                                                                                                                                                                                                                                                                                                                                                                                                                                                                                                                                                                                                                                                                                                                                                                                                                                                                                                                                                                                                                  |    |
| Key results       | 18 | The efficiency of county public hospitals needs to be improved. Bed size above a certain threshold will lead to decreasing returns to scale .                                                                                                                                                                                                                                                                                                                                                                                                                                                                                                                                                                                                                                                                                                                                                                                                                                                                                                                                                                                                                                                                                                                                                                                                                                                                                                                                                                                                                                                                                                                                                                                                                                    | 9  |
| Limitations       | 19 | First, the sample hospitals were selected from Shandong Province in eastern China, while hospitals located in central and western areas were excluded. Second, the data in this study cover only 2017, and cannot form panel data, leading to a lack of longitudinal analysis and comparison.                                                                                                                                                                                                                                                                                                                                                                                                                                                                                                                                                                                                                                                                                                                                                                                                                                                                                                                                                                                                                                                                                                                                                                                                                                                                                                                                                                                                                                                                                    | 11 |
| Interpretation    | 20 | There is still room for improvement of hospital efficiency in China, which is consistent with numerous studies. For example, Zhaohui Cheng, et al suggested that only 8.8% of the 114 sample hospitals in Henan Province in China were defined as technically efficient. In addition, When the number of beds exceeds 885, the returns to scale of the hospital began to move into the DRS. However, Siping Dong stated that the vast majority of county hospitals in Hubei Province had more than 335 beds, which was generally in a state of DRS. This may be related to different factors such as the population base of different provinces and the release of medical service demand due to the expansion of China's medical insurance coverage. Internationally, several articles in business and economics journals focused on evaluating the benefits of hospital scale have shown that the IRS appears in hospitals with 300 and 600 beds. Banker RD observed that increasing returns to scale could be exploited up to a capacity of approximately 200 beds. Our study concluded that IRS should be controlled below 1100 beds. The scale effect of all sample hospitals with more than 1100 beds was already saturated, and some hospitals even had a negative scale effect. Research undertaken in the USA and the United Kingdom indicated that diseconomies of scale can be expected to occur below approximately 200 beds and above 600 beds. Weaver M and Deolalikar A concluded that economies of scale depend on the type of hospital, as well as the number of beds and outputs in research on the scale economies of 654 Vietnamese public hospitals. China is a country with a large population, and its demand for medical services is higher than that of | 9  |

1  
2  
3  
4  
5  
6  
7  
8  
9  
10  
11  
12  
13  
14  
15  
16  
17  
18  
19  
20  
21  
22  
23  
24  
25  
26  
27  
28  
29  
30  
31  
32  
33  
34  
35  
36  
37  
38  
39  
40  
41  
42  
43  
44  
45  
46

---

other countries. The health sector has been implementing a hierarchical diagnosis and treatment model, and striving to make the county hospital visit rate 90% by 2020. The interval of beds for IRS in county public hospitals may be broader than that in other countries.

---

|                  |    |                                                                                                                                                                                                                                                                                                                                                                                                              |          |
|------------------|----|--------------------------------------------------------------------------------------------------------------------------------------------------------------------------------------------------------------------------------------------------------------------------------------------------------------------------------------------------------------------------------------------------------------|----------|
| Generalisability | 21 | Whether in China or elsewhere, conducting hospital efficiency and scale studies is urgent. Using data envelopment analysis to evaluate hospital efficiency, it enriches the research field of efficiency evaluation tool. This study confirmed that bed size is not the more the better. The finding can provide reference for other countries to improve hospital efficiency and control hospital bed size. | 3 and 11 |
|------------------|----|--------------------------------------------------------------------------------------------------------------------------------------------------------------------------------------------------------------------------------------------------------------------------------------------------------------------------------------------------------------------------------------------------------------|----------|

---

**Other information**

---

|         |    |      |  |
|---------|----|------|--|
| Funding | 22 | None |  |
|---------|----|------|--|

---

\*Give information separately for cases and controls in case-control studies and, if applicable, for exposed and unexposed groups in cohort and cross-sectional studies.

**Note:** An Explanation and Elaboration article discusses each checklist item and gives methodological background and published examples of transparent reporting. The STROBE checklist is best used in conjunction with this article (freely available on the Web sites of PLoS Medicine at <http://www.plosmedicine.org/>, Annals of Internal Medicine at <http://www.annals.org/>, and Epidemiology at <http://www.epidem.com/>). Information on the STROBE Initiative is available at [www.strobe-statement.org](http://www.strobe-statement.org).

# BMJ Open

## Cross-sectional study of the efficiency and scale effect of county public hospitals in Shandong Province, China

|                                 |                                                                                                                                                                                                                                                                                                                                                                                 |
|---------------------------------|---------------------------------------------------------------------------------------------------------------------------------------------------------------------------------------------------------------------------------------------------------------------------------------------------------------------------------------------------------------------------------|
| Journal:                        | <i>BMJ Open</i>                                                                                                                                                                                                                                                                                                                                                                 |
| Manuscript ID                   | bmjopen-2019-035703.R2                                                                                                                                                                                                                                                                                                                                                          |
| Article Type:                   | Original research                                                                                                                                                                                                                                                                                                                                                               |
| Date Submitted by the Author:   | 04-Apr-2020                                                                                                                                                                                                                                                                                                                                                                     |
| Complete List of Authors:       | Li, Qian; The Affiliated Hospital of Qingdao University; Qingdao University,<br>Tian, Liqi; The Affiliated Hospital of Qingdao University<br>Jing, Xiaolin; The Affiliated Hospital of Qingdao University<br>Chen, Xianghua; The Affiliated Hospital of Qingdao University<br>Li, Jiangfeng; The Affiliated Hospital of Qingdao University<br>Chen, Huixin; Qingdao University, |
| <b>Primary Subject Heading</b>: | Health economics                                                                                                                                                                                                                                                                                                                                                                |
| Secondary Subject Heading:      | Health policy, Health services research                                                                                                                                                                                                                                                                                                                                         |
| Keywords:                       | Health economics < HEALTH SERVICES ADMINISTRATION & MANAGEMENT, Rationing < HEALTH SERVICES ADMINISTRATION & MANAGEMENT, Quality in health care < HEALTH SERVICES ADMINISTRATION & MANAGEMENT                                                                                                                                                                                   |
|                                 |                                                                                                                                                                                                                                                                                                                                                                                 |

SCHOLARONE™  
Manuscripts





I, the Submitting Author has the right to grant and does grant on behalf of all authors of the Work (as defined in the below author licence), an exclusive licence and/or a non-exclusive licence for contributions from authors who are: i) UK Crown employees; ii) where BMJ has agreed a CC-BY licence shall apply, and/or iii) in accordance with the terms applicable for US Federal Government officers or employees acting as part of their official duties; on a worldwide, perpetual, irrevocable, royalty-free basis to BMJ Publishing Group Ltd ("BMJ") its licensees and where the relevant Journal is co-owned by BMJ to the co-owners of the Journal, to publish the Work in this journal and any other BMJ products and to exploit all rights, as set out in our [licence](#).

The Submitting Author accepts and understands that any supply made under these terms is made by BMJ to the Submitting Author unless you are acting as an employee on behalf of your employer or a postgraduate student of an affiliated institution which is paying any applicable article publishing charge ("APC") for Open Access articles. Where the Submitting Author wishes to make the Work available on an Open Access basis (and intends to pay the relevant APC), the terms of reuse of such Open Access shall be governed by a Creative Commons licence – details of these licences and which [Creative Commons](#) licence will apply to this Work are set out in our licence referred to above.

Other than as permitted in any relevant BMJ Author's Self Archiving Policies, I confirm this Work has not been accepted for publication elsewhere, is not being considered for publication elsewhere and does not duplicate material already published. I confirm all authors consent to publication of this Work and authorise the granting of this licence.

# Cross-sectional study of the efficiency and scale effect of county public hospitals in Shandong Province, China

Qian Li<sup>1</sup>, Liqi Tian<sup>1</sup>, Xiaolin Jing<sup>1</sup>, Xianghua Chen<sup>1</sup>, Jiangfeng Li<sup>1</sup>, Huixin Chen<sup>2</sup>

## Author affiliations

1. The Affiliated Hospital of Qingdao University, Qingdao, Shandong province, People's Republic of China

2. Department of Social Medicine and Health Management, School of Medicine, Qingdao University, Qingdao, Shandong province, People's Republic of China

## Correspondence to

Dr Li-qi Tian; tlq1738@sina.com

## ABSTRACT

**Objective:** To evaluate the efficiency of county public hospitals in Shandong Province following China's new medical reform and compare the efficiency of hospitals with different bed size for improving efficiency.

**Design and setting:** This was a cross-sectional study on the efficiency and size of 68 county public hospitals in China in 2017.

**Outcome measures:** Data envelopment analysis (DEA) was used to calculate the efficiency scores of hospitals and to analyze the slack values of inefficient hospitals. The actual number of open beds, doctors, nurses and total expenditure were selected as inputs, and the total number of annual visits, discharges and total income were selected as outputs. The Kruskal-Wallis H test was employed to compare the efficiency of hospitals with different bed size. The Chi-square ( $\chi^2$ ) test was used to compare the returns to scale (RTS) of hospitals with different bed size.

**Results:** Twenty (29.41%) hospitals were efficient. There were 27 hospitals with increasing returns to scale (IRS), 23 hospitals with constant returns to scale (CRS), and 18 hospitals with decreasing returns to scale (DRS). The differences in technical efficiency (TE,  $P=0.248$ ,  $P>0.05$ ) and pure technical efficiency (PTE,  $P=0.073$ ,  $P>0.05$ ) were not statistically significant. However, the differences in scale efficiency (SE,  $P=0.047$ ,  $P<0.05$ ) and returns to scale ( $P<.001$ ) were statistically significant. Hospitals with DRS began to appear at 885 beds.

1  
2  
3  
4 All sample hospitals with more than 1100 beds were already saturated, and some hospitals  
5 even had a negative scale effect.  
6

7 **Conclusions:** The government and hospital managers should strictly control the bed size in  
8 hospital and make hospitals resume operating in the interests of public welfare. Interventions  
9 that rationally allocate health resources and improve the efficiency of medical workers are  
10 conducive to solving redundant inputs and insufficient outputs.  
11  
12  
13  
14

#### 15 **Strengths and limitations of this study**

16  
17 The DEA accommodated multiple inputs and multiple outputs, which is in line with the  
18 characteristics of hospitals.  
19

20  
21 The DEA did not need to use a common denominator, ensuring the diversity of indicators.  
22

23 This study identified the extent and source of hospital inefficiencies to help hospitals take  
24 remedial measures.  
25

26  
27 The results produced by the DEA were sensitive to measurement errors and may  
28 underestimate or overestimate the efficiency scores.  
29

30  
31 Due to the objective limitations of the data, the study included hospitals only in eastern China.  
32

## 33 **INTRODUCTION**

34  
35 The unreasonable allocation and utilization of resources have seriously affected the  
36 production efficiency of health services.<sup>1</sup> Pursuing efficiency is of vital importance to  
37 policy-makers and hospital managers.<sup>2</sup> Evaluating hospital efficiency can help hospital  
38 policy-makers improve inefficiencies with rational policies, and help managers to know  
39 whether medical resources are optimally allocated and fully utilized.  
40  
41  
42  
43  
44

45 The focus of medical reform in China has been on hospital efficiency and quality. Prior  
46 studies held that the efficiency of hospitals needed to be further improved, and there were  
47 some problems such as the inefficient allocation of resources and the blind expansion of  
48 scale.<sup>3 4</sup> In 2016, the National Health Commission issued "Guidelines for Medical Institution  
49 Planning (2016-2020)", which required hospitals to strictly control the bed size.  
50  
51 Unfortunately, there has been no significant effect. In fact, in most hospitals, the number of  
52 beds is still on the rise. The price of medical services in China is regulated by the government,  
53 and the zero-price gap policy for drugs and consumables has severely curtailed the sources of  
54  
55  
56  
57  
58  
59  
60

1  
2  
3  
4 hospital revenue. Although it is a public hospital, government investment is insufficient to  
5 meet the needs of hospital development. The expansion of scale can attract more health  
6 resources and financial investment for hospitals, and it can also reduce the unit cost.  
7  
8 Therefore, the benefits of hospital expansion in China are compelling. Of course, the reasons  
9 for expansion do not rule out the increase in medical demand.  
10  
11  
12

13  
14 Unexpectedly, the number of beds in the largest public hospital in China has reached 10000  
15 beds. Is it the case that the more hospital beds there are, the better the hospital's efficiency?  
16 Most studies on scale efficiency have focused on analyzing the appropriate use of resources<sup>5 6</sup>  
17 and estimating the optimal size of hospitals.<sup>7-9</sup> Novosadova *et al*<sup>10</sup> compared the efficiency of  
18 large and small acute hospitals and gave scores in terms of technical and scale efficiency. It  
19 turned out that smaller hospitals tended to be more efficient than larger ones. Fidler *et al*<sup>11</sup>  
20 examined the size effect of reorganized hospitals in Austria and Estonia. Policy-makers  
21 believed that the combined large hospitals can reduce average costs and improve clinical  
22 outcomes. In contrast, employees argued that the merger neither generated economies of scale  
23 nor significantly improved quality. In short, regardless of whether hospitals are in China or  
24 elsewhere, conducting studies on hospital efficiency and scale economies is crucial to solve  
25 the optimal production size and to achieve the fair allocation of resources.<sup>12</sup>  
26  
27  
28  
29  
30  
31  
32  
33  
34  
35  
36

37  
38 General hospitals are pioneers in the reform of county public hospitals and are also the  
39 primary carrier for the government to provide basic medical services to residents living in  
40 counties. Shandong Province, located in eastern China, is one of the major coastal provinces.  
41 It is also a populous province. At the end of 2017, the total residential population reached  
42 more than 100 million. Shandong Province took the lead in starting a comprehensive reform  
43 of county public hospitals, which played an exemplary role for the country as a whole.  
44 Therefore, taking county public general hospitals in Shandong Province as a sample for  
45 evaluating the efficiency and exploring scale effect of county public hospitals is  
46 representative. We anticipate that this study will provide a reference for other regions in  
47 regard to efficiency evaluation and scale development.  
48  
49  
50  
51  
52  
53  
54  
55

## 56 **METHODS**

### 57 **Sample and variable selection**

58  
59  
60

The data set was collected from the health statistics information reporting system of the Hospital Management Research Institute of Qingdao University and was provided by 71 county public hospitals from March to June 2018. First, DEA premised on the selection of similar decision making units (DMUs), so the sample was composed of the county public general hospitals. Second, all no variables in the sample hospitals should include missing or abnormal values. Third, this study selected counties with one and only one general hospital. Two hospitals were removed for missing data. Another hospital was removed because the district it belonged to was merged. As a result, 68 hospitals were eventually identified for research under the above requirements.

The study selected seven input and output variables that fit the characteristics of hospital efficiency. The actual number of open beds, the number of doctors, the number of nurses, and total expenditure were used as inputs, to represent material, human and financial resources. The total number of annual visits, the number of discharges, and total income were used as outputs to represent the quantity, quality and benefits of medical services. The variables were determined under the guidance of previous empirical studies.<sup>13-17</sup> The calculation process was implemented by means of DEAP 2.1 software. The specific indicators are explained in Table 1.

Table 1 Definition of the inputs and outputs

| Category | Variable                      | Definition                                                      |
|----------|-------------------------------|-----------------------------------------------------------------|
| Inputs   | Actual number of open beds    | The number of beds actually opened at the end of the year.      |
|          | Number of doctors             | The number of practising (assistant) physicians.                |
|          | Number of nurses              | The number of qualified nurse practitioners.                    |
|          | Total expenditure             | The expenses incurred by the hospital at the end of the year.   |
| Outputs  | Total number of annual visits | The number of visits, counted by the number of registrations.   |
|          | Number of discharges          | The number of all discharged patients after hospitalization.    |
|          | Total income                  | The total income earned by the hospital at the end of the year. |

### Efficiency evaluation methods

Currently, the evaluation of hospital efficiency focuses on the use of economic models.<sup>18 19</sup> Stochastic frontier analysis (SFA) and the technique for order preference by similarity to an ideal solution (TOPSIS) are also commonly used in efficiency evaluation.<sup>20 21</sup> SFA is limited to evaluating the objects of multiple inputs and single output. Although absolute efficiency can be measured, the ability to distinguish allocation efficiency from technical efficiency is

weak.<sup>6</sup> With the TOPSIS method, the weight of the indexes is subjective, which may affect the accuracy of the results.<sup>21</sup> International studies have shown that data envelopment analysis is an important tool in evaluating hospital efficiency.<sup>22-24</sup> DEA is a mature and advanced non-parametric method that compensates for the shortcomings of the above methods. It can solve problems with multiple inputs and multiple outputs. Not only can efficiency be evaluated and ranked, but the source of inefficient decision making units and the extent of improvement can also be further tracked.<sup>13 19</sup>

### Data envelopment analysis

Data envelopment analysis is an evaluation method that was first proposed by the famous American operations researcher A.Charnes and scholar W.W.Cooper<sup>22 25</sup> in 1978, based on the concept and connotation of relative efficiency.<sup>26</sup> CCR and BCC are the most commonly used models.<sup>2</sup> In this paper, a two-stage DEA was used to conduct research using the CCR and BCC models of the output-oriented model. The output-oriented model involves how to increase or maximize output without changing the proportion of input.<sup>17 22</sup> Based on the assumption of constant returns to scale (CRS), Charnes extended and developed the CCR model, which is mainly used to measure the TE score of DMUs.<sup>27</sup> A score equal to 1 indicates that the DMU is efficient. A score of less than 1 indicates that the DMU is inefficient.

$$(D_{CCR}) \begin{cases} \max \phi \\ \sum_{j=1}^n x_j \lambda_j \leq x_0 \\ \sum_{j=1}^n y_j \lambda_j \geq \phi y_0 \\ \lambda_j \geq 0, j = 1, 2, \dots, n \end{cases}$$

$$x_j = (x_{1j}, x_{2j}, \dots, x_{mj})^T > 0, y_j = (y_{1j}, y_{2j}, \dots, y_{sj})^T > 0,$$

$$x_0 = x_{j_0}, y_0 = y_{j_0}, 1 \leq j_0 \leq n$$

The scholars then developed the BCC model based on variable return to scale (VRS) to separate pure technical efficiency (PTE) from scale efficiency (SE).<sup>28</sup> The BCC model mainly measures the PTE and SE of the DMU.<sup>29</sup> The BCC model is an extension of the CCR model.

$$(D_{BCC}) \begin{cases} \min \phi \\ \sum_{j=1}^n x_j \lambda_j \leq x_0 \\ \sum_{j=1}^n y_j \lambda_j \geq \phi y_0 \\ \sum_{j=1}^n \lambda_j = 1 \\ \lambda_j \geq 0, j = 1, 2, \dots, n \end{cases}$$

$$x_j = (x_{1j}, x_{2j}, \dots, x_{mj})^T > 0, y_j = (y_{1j}, y_{2j}, \dots, y_{sj})^T > 0,$$

$$x_0 = x_{j_0}, y_0 = y_{j_0}, 1 \leq j_0 \leq n$$

## Statistical methods

This study defined the size of hospitals based on the actual number of open beds. The sample hospitals were divided into four groups: 500 beds and below, 501-1000 beds, 1001-1500 beds and 1501 beds and above. The Kruskal-Wallis H non-parametric test was used to compare the efficiency of hospitals with different bed size. Efficiency included technical efficiency, pure technical efficiency, and scale efficiency. The Chi-square ( $\chi^2$ ) test was used to compare the differences in the returns to scale of hospitals with different bed size. Statistical analysis was performed using SPSS 25.0.

## RESULTS

### Description of the inputs and outputs

Table 2 is a descriptive summary of the inputs and outputs of the 68 sample hospitals. The data indicated that the average number of open beds per hospital was 991.0 in 2017. The average number of doctors and nurses per hospital was 352.7 and 529.3 respectively. With an average of 527,816.1 visits per hospital per year, the efficiency of the hospitals is commendable.

Table 2 Descriptive statistics of inputs and outputs

| Indicators                       | Minimum | Maximum   | Average  | SD       |
|----------------------------------|---------|-----------|----------|----------|
| <b>Inputs</b>                    |         |           |          |          |
| Actual number of open beds       | 185.0   | 2220.0    | 991.0    | 373.6    |
| Number of doctors                | 101.0   | 670.0     | 352.7    | 126.3    |
| Number of nurses                 | 149.0   | 971.0     | 529.3    | 191.5    |
| Total expenditure (ten thousand) | 8184.0  | 90030.0   | 41587.8  | 17910.3  |
| <b>Outputs</b>                   |         |           |          |          |
| Total number of annual visits    | 87116.0 | 1511751.0 | 527816.1 | 257916.2 |
| Number of discharges             | 8689.0  | 99565.0   | 43127.6  | 17099.7  |

|                             |        |         |         |         |
|-----------------------------|--------|---------|---------|---------|
| Total income (ten thousand) | 8133.3 | 91991.0 | 42958.6 | 18356.4 |
|-----------------------------|--------|---------|---------|---------|

### Hospital efficiency scores from the DEA

Table 3 shows the distribution of the efficiency scores for the sample hospitals. Only 20 (29.41%) hospitals were 100% efficient in technical efficiency, and 48 (70.59%) hospitals were inefficient. The pure technical efficiency of 26 (38.24%) hospitals was efficient, while the remaining 42 (61.76%) were inefficient. All hospitals had scale efficiency scores above 0.900, but only 23 (33.82%) were fully efficient. The efficiency score of all sample hospitals are shown in Appendix 1.

Table 3 Distribution of the efficiency scores for the sample hospitals

| Scoring range             | 1.000       | 0.999-0.900 | 0.899-0.800 | 0.799-0.700 |
|---------------------------|-------------|-------------|-------------|-------------|
| Efficiency                |             |             |             |             |
| Technical efficiency      | 20 (29.41%) | 32 (47.06%) | 15 (22.06%) | 1 (1.47%)   |
| Pure technical efficiency | 26 (38.24%) | 30 (44.12%) | 11 (16.18%) | 1 (1.47%)   |
| Scale efficiency          | 23 (33.82%) | 45 (66.18%) | 0 (0.00%)   | 0 (0.00%)   |

### Slack value of the inputs and outputs of inefficient hospitals

This study analyzed the slack values of 48 inefficient hospitals. In other words, the differences between the actual value and the ideal value of the variables were calculated. Taking hospital H16 as an example, the actual number of doctors was 38.8 more than the ideal number. As shown in Table 4, hospital H16 needs to increase the total number of visits by 15%, the number of discharges by 6% and total income by 6% to make full use of its current resources.

Table 4 The slack value of the inputs and outputs of hospital H16

| DMU | Related indicators | Inputs |         |        |             | Outputs  |            |         |
|-----|--------------------|--------|---------|--------|-------------|----------|------------|---------|
|     |                    | Beds   | Doctors | Nurses | Expenditure | Visits   | Discharges | Income  |
| H16 | Actual value       | 717.0  | 300.0   | 344.0  | 27508.0     | 418402.0 | 35536.0    | 28743.0 |
|     | Ideal value        | 717.0  | 261.2   | 344.0  | 27508.0     | 479793.2 | 37800.8    | 30574.8 |
|     | Slack value        | 0.00   | 38.8    | 0.00   | 0.00        | -61391.2 | -2264.8    | -1831.8 |
|     | Change ratio       | 0%     | 13%     | 0%     | 0%          | -15%     | -6%        | -6%     |

### Differences in TE, PTE and SE among hospitals with different bed size

There were no significant differences in TE ( $P=0.248$ ,  $P>0.05$ ) and PTE ( $P=0.073$ ,  $P>0.05$ ) among the four comparison groups. However, the difference in SE was statistically significant ( $P=0.047$ ,  $P<0.05$ ). See Table 5 for details.

Table 5 Statistical analysis results of the efficiency of hospitals with different bed size

| Efficiency | Bed size        | $\bar{X}\pm S$    | $\chi^2$ value | $P$ value |
|------------|-----------------|-------------------|----------------|-----------|
| Technical  | $\leq 500$ beds | 0.965 $\pm$ 0.049 | 4.131          | 0.248     |



|                           |                |             |        |       |
|---------------------------|----------------|-------------|--------|-------|
| efficiency                | 501-1000 beds  | 0.927±0.064 | 6.954  | 0.073 |
|                           | 1001-1500 beds | 0.957±0.045 |        |       |
|                           | ≥1501 beds     | 0.930±0.046 |        |       |
| Pure technical efficiency | ≤500 beds      | 0.983±0.031 | 10.321 | 0.047 |
|                           | 501-1000 beds  | 0.934±0.060 |        |       |
|                           | 1001-1500 beds | 0.967±0.041 |        |       |
| Scale efficiency          | ≥1501 beds     | 0.979±0.037 | 10.321 | 0.047 |
|                           | ≤500 beds      | 0.989±0.022 |        |       |
|                           | 501-1000 beds  | 0.992±0.011 |        |       |
|                           | 1001-1500 beds | 0.989±0.013 |        |       |
|                           | ≥1501 beds     | 0.951±0.032 |        |       |

### Differences in returns to scale among hospitals with different bed size

The findings in Table 6 suggested that the difference in the returns to scale of hospitals with different bed size was significant ( $P<.001$ ). Twenty-three hospitals with the scale efficiency score equal to 1 were constant returns to scale. This means that these hospitals not only have the optimal bed size, but also have the lowest operation costs, additionally, their inputs and outputs were in balance. The inefficient hospitals were divided into two categories: increasing returns to scale and decreasing returns to scale. The 27 hospitals with IRS had insufficient inputs and needed to expand their scale to achieve better efficiency. The 18 hospitals with DRS had redundant inputs and needed to scale down and optimize their allocation of resources.

Table 6 Statistical analysis results of the returns to scale of hospitals with different bed sizes

| Returns to scale<br>Bed size | Returns to scale |             |             | Total     | $\chi^2$ value | P value |
|------------------------------|------------------|-------------|-------------|-----------|----------------|---------|
|                              | IRS              | CRS         | DRS         |           |                |         |
| ≤500 beds                    | 2 (50%)          | 2 (50%)     | 0 (0%)      | 4 (100%)  | 32.023         | <.001   |
| 501-1000 beds                | 23 (63.89%)      | 11 (30.56%) | 2 (5.56%)   | 36 (100%) |                |         |
| 1001-1500 beds               | 2 (8.70%)        | 9 (39.13%)  | 12 (52.17%) | 23 (100%) |                |         |
| ≥1501 beds                   | 0 (0%)           | 1 (20%)     | 4 (80%)     | 5 (100%)  |                |         |
| Total                        | 27               | 23          | 18          | 68        |                |         |

A scatter plot was produced to highlight the relationship between bed size, scale efficiency and returns to scale. As depicted in Figure 1, with the increase in the number of hospital beds, the scale efficiency of hospitals approximately first increased and then decreased. It was obvious that only one hospital was efficient in the ≥1501 beds group, and the remaining four hospitals were not only inefficient, but also had a low scale efficiency score.

In addition, hospitals with DRS began to appear at 885 beds. A large number of hospitals in the 1001-1500 beds and ≥1501 beds groups were already in DRS. Of the 11 hospitals with

1  
2  
3  
4 more than 1300 beds, 9 (81.8%) were DRS. When the bed size exceeded 1100 beds, there  
5  
6 were no longer hospitals with IRS. All sample hospitals with more than 1100 beds were  
7  
8 already saturated, and some hospitals even had a negative scale effect.  
9

10  
11 Figure 1 Scatter plot of the relationship between bed size and scale efficiency and returns to scale  
12

## 13 DISCUSSION

14  
15 An increasing number of countries have been using DEA to evaluate hospital efficiency.<sup>2 14 18</sup>  
16  
17 <sup>30</sup> The findings indicated that 48 sample hospitals were inefficient. That was, more than 70%  
18  
19 of hospitals had problems of excessive inputs or insufficient outputs, which was consistent  
20  
21 with the results of many experts.<sup>1 31 32</sup> Cheng *et al*<sup>31</sup> suggested that only 8.8% of the 114  
22  
23 county hospitals in Henan Province, China, were defined as technically efficient, and  
24  
25 proposed that the efficiency needed to be improved. Our study found that the outputs of  
26  
27 inefficient hospitals had higher slack values, largely because of underutilized resources. In the  
28  
29 research on the equity and efficiency of health resource allocation in mainland China, Zhang  
30  
31 *et al*<sup>33</sup> pointed out that many provinces in China had problems of idle and underutilized health  
32  
33 resources. This may be due to the inefficient use of resources by medical staff. It may also be  
34  
35 because county hospitals are limited by their own service capabilities, resulting in a loss of  
36  
37 patients, which makes resources idle and difficult to use efficiently in turn.

38  
39 The blind expansion of bed size is a common problem in Chinese hospitals.<sup>34</sup> In theory, due  
40  
41 to economies of scale, more beds should result in higher efficiency score. However, the  
42  
43 results did not prove that the scale difference in hospital technical efficiency was significant.  
44  
45 This may be because the effect of bed size on technical efficiency is not obvious or the  
46  
47 difference depends on the combined effect of size and other factors. As a public welfare  
48  
49 undertaking led by the government, the development of hospitals cannot be separated from  
50  
51 the support of the government. In recent years, the government has reduced the supply of  
52  
53 resources to hospitals with DRS by imposing reasonable controls on hospital construction and  
54  
55 the purchase of large equipments.<sup>35</sup> Asmild *et al*<sup>36</sup> used DEA to study the optimal size of  
56  
57 hospitals, especially the relationship between efficiency and size, and indicated that different  
58  
59 hospitals had different efficiencies that depended on location, the population served, and the  
60  
60 policies which provincial governments wish to implement.

1  
2  
3  
4 The difference in PTE was not significant. It can be speculated that the siphon effect of  
5 scale on medical technology and equipment had been alleviated. In the future, regardless of  
6 the size of the hospital, medical technology and equipment will gradually achieve fairness and  
7 homogeneity. This will be a good vision for future hospital development. The hospitals scored  
8 higher on PTE, with an average score of 0.951. Shandong Province and other areas of China  
9 have given strong support and attention to the investment and renewal of medical equipment,  
10 the strengthening of hospital information systems,<sup>37</sup> and the connection of internet hospitals.  
11 Excluding the impact of scale factors, hospitals have produced better improvements in  
12 efficiency through pure technology.  
13  
14  
15  
16  
17  
18  
19  
20

21 This study found that the bed size will affect the SE and RTS of hospitals. Below a critical  
22 range, an increase in the number of beds can lead to an increase in efficiency, but beyond the  
23 threshold, the increase will result in a decrease in efficiency. The findings indicated that  
24 hospitals with DRS began to appear at 885 beds. A large number of hospitals in the  
25 1001-1500 beds and  $\geq 1501$  beds groups were already in DRS. However, Dong<sup>38</sup> stated that  
26 the vast majority of county hospitals in Hubei Province had more than 335 beds, and were  
27 generally in a state of DRS. The results of Dong's study and our study were quite different.  
28 Over time, the difference may be related to different factors such as the population base of  
29 different provinces and the release of medical service demand due to the expansion of China's  
30 medical insurance coverage.  
31  
32  
33  
34  
35  
36  
37  
38  
39  
40

41 Internationally, several articles focused on evaluating the benefits of hospital scale in  
42 business and economics journals showed that the IRS appeared in hospitals with 300 and 600  
43 beds.<sup>39 40</sup> Banker *et al*<sup>41</sup> observed that the increasing returns to scale could be exploited up to  
44 a capacity of approximately 200 beds. Our study concluded that IRS should be controlled  
45 below 1100 beds. The scale effect of all sample hospitals with more than 1100 beds was  
46 already saturated, and some hospitals even had a negative scale effect. Research undertaken in  
47 the USA and the United Kingdom indicated that diseconomies of scale can be expected to  
48 occur below approximately 200 beds and above 600 beds.<sup>12 42</sup> Weaver *et al*<sup>9</sup> in a research  
49 which is about the scale economies of 654 Vietnamese public hospitals, concluded that  
50 economies of scale depend on the type of hospital, as well as the number of beds and outputs.  
51 Specifically, when the average number of beds was 516, the Vietnamese Central General  
52  
53  
54  
55  
56  
57  
58  
59  
60

Hospitals were in CRS. China is a country with a large population, and its demand for medical services is higher than that of other countries. The health sector has been implementing a hierarchical diagnosis and treatment model, and striving to make the county hospital visit rate 90% by 2020. The interval of beds for IRS in county public hospitals may be broader than that in other countries.

### **Limitations**

This study evaluated the efficiency of county public hospitals in Shandong Province following the new medical reform, and explored the influence of scale on hospital efficiency. It provided a reference for the government and hospitals to reasonably control bed size, and it offered a warning to hospitals with regard to blindly expanding. However, the study has several limitations. First, the sample hospitals were selected from Shandong Province in eastern China, while hospitals located in central and western areas were excluded. Second, the data in this study covered only 2017, and cannot form panel data, leading to a lack of longitudinal analysis and comparison. Bias adjustments of efficiency scores were not carried out due to limitation of the DEA approach. We will continue to track the efficiency of county public hospitals in Shandong Province in the next study.

### **CONCLUSIONS**

This study evaluated and compared the efficiency of 68 county public hospitals in Shandong Province using DEA. These hospitals had higher efficiency scores, but most hospitals had problems of an unreasonable allocation and inadequate utilization of health resources. Hospitals should mobilize the enthusiasm of medical staff and continuously improve human efficiency. The synergy between human efficiency and pure technical efficiency will lead to higher efficiency in hospitals.

This study further demonstrated that the blind expansion of bed size did not lead to greater hospital efficiency. County public hospitals should avoid blindly expanding their scale and should take various effective measures to improve their efficiency. County public hospitals, as the main providers of services to county residents, should accurately locate the service contents based on the functions of hospitals, the types of residents' medical needs and the structure of the population they serve. We hope that this study will provide a reference for

1  
2  
3  
4 other regions to evaluate efficiency and control scale.  
5

6 **Acknowledgement** We would like to thank 71 county public hospitals for their cooperation  
7 and providing us with true hospital data. We are very pleased with all the staff of the Hospital  
8 Management Research Institute of Qingdao University. They are very enthusiastic about the  
9 aggregation and cleaning of the data of 71 hospitals, so that we have an intuitive  
10 understanding of the data. Thanks to Xiaolin Jing for giving me a lot of guidance on the  
11 writing of the thesis and the correction of the grammar.  
12  
13

14 **Contributors** LT and JL contributed to the conceptualization and design of the research. XC  
15 and HC spared no effort to collect and standardize data. QL and XC contributed to the  
16 analysis and interpretation of the data and provided statistical analysis support. XJ gave  
17 guidance on the writing of the article. QL drafted the article. All authors critically revised the  
18 manuscript and eventually approved the version to be released.  
19  
20  
21  
22  
23  
24  
25  
26

27 **Funding** The authors have not declared a specific grant for this research from any funding  
28 agency.  
29  
30

31 **Competing interests** None declared.  
32

33 **Patient and public involvement** No patient involved  
34

35 **Ethics approval** Ethical approval was gained from the Ethics Committee of the Affiliated  
36 Hospital of Qingdao University.  
37  
38

39 **Provenance and peer review** Not commissioned; externally peer reviewed.  
40

41 **Data availability statement** The authors will not share the data for this work. The data for  
42 this study was obtained by applying to the Institute of Hospital Management of Qingdao  
43 University and involved private information such as hospital financial data.  
44  
45  
46

## 47 REFERENCES

- 48  
49 1. Sun J, Luo H. Evaluation on equality and efficiency of health resources allocation and health services  
50 utilization in China. *Int J Equity Health* 2017;16(1):127.doi: 10.1186/s12939-017-0614-y  
51  
52 2. Jia T, Yuan H. The application of DEA (Data Envelopment Analysis) window analysis in the  
53 assessment of influence on operational efficiencies after the establishment of branched hospitals.  
54 *BMC Health Serv Res* 2017;17(1):265.doi: 10.1186/s12913-017-2203-6  
55  
56 3. Feng JH. Study on the Change of Operation Efficiency of County Public Hospitals in Chenzhou City.  
57 University Of Nanhua, 2017.  
58  
59 4. Li JM, Yao JW, LU J, et al. Analysis of medical service efficiency of county-level public hospitals in  
60 Gansu province based on DEA model. *Health Soft Science* 2019;33(04):61-65.doi:

- doi:10.3969/j.issn.1003-2800.2019.04.013
5. Kirigia JM, Emrouznejad A, Cassoma B, et al. A performance assessment method for hospitals: the case of municipal hospitals in Angola. *J Med Syst* 2008;32(6):509-19. doi: 10.1007/s10916-008-9157-5
  6. Varabyova Y, Schreyogg J. International comparisons of the technical efficiency of the hospital sector: panel data analysis of OECD countries using parametric and non-parametric approaches. *Health policy* 2013;112(1-2):70-9. doi: 10.1016/j.healthpol.2013.03.003
  7. Azevedo H, Mateus C. Cost effects of hospital mergers in Portugal. *Eur J Health Econ* 2014;15(9):999-1010. doi: 10.1007/s10198-013-0552-6
  8. Kristensen T, Bogetoft P, Pedersen KM. Potential gains from hospital mergers in Denmark. *Health Care Manag Sci* 2010;13(4):334-45. doi: 10.1007/s10729-010-9133-8
  9. Weaver M, Deolalikar A. Economies of scale and scope in Vietnamese hospitals. *Soc Sci Med* 2004;59(1):199-208. doi: 10.1016/j.socscimed.2003.10.014
  10. Novosadova I, Dlouhy M. Evaluation of technical efficiency of acute hospitals and its relation to wages of health personnel. *Ekonomika* 2007;55(8):783-92. doi: none
  11. Fidler AH, Haslinger RR, Hofmarcher MM, et al. Incorporation of public hospitals: a "silver bullet" against overcapacity, managerial bottlenecks and resource constraints? Case studies from Austria and Estonia. *Health policy* 2007;81(2-3):328-38. doi: 10.1016/j.healthpol.2006.06.007
  12. Giancotti M, Guglielmo A, Mauro M. Efficiency and optimal size of hospitals: Results of a systematic search. *PLoS one* 2017;12(3):e0174533. doi: 10.1371/journal.pone.0174533
  13. Sultan WIM, Crispim J. Measuring the efficiency of Palestinian public hospitals during 2010-2015: an application of a two-stage DEA method. *BMC Health Serv Res* 2018;18(1):381. doi: 10.1186/s12913-018-3228-1
  14. Du J, Wang J, Yao C, et al. Incorporating health outcomes in Pennsylvania hospital efficiency: an additive super-efficiency DEA approach. *Ann Oper Res* 2014;221(1):161-72. doi: 10.1007/s10479-011-0838-y
  15. Kjekshus L, Hagen T. Do hospital mergers increase hospital efficiency? Evidence from a National Health Service country. *J Health Serv Res Policy* 2007;12(4):230-5. doi: 10.1258/135581907782101561
  16. Afonso A, Fernandes S. Assessing Hospital Efficiency: Non-Parametric Evidence for Portugal. *SSRN Electronic Journal* 2008. doi: 10.2139/ssrn.1092135
  17. Li H, Dong S, Liu T. Relative efficiency and productivity: a preliminary exploration of public hospitals in Beijing, China. *BMC Health Serv Res* 2014;14:158. doi: 10.1186/1472-6963-14-158
  18. Osei D, d'Almeida S, George MO, et al. Technical efficiency of public district hospitals and health centres in Ghana: a pilot study. *Cost effectiveness and resource allocation : C/E* 2005;3:9. doi: 10.1186/1478-7547-3-9
  19. Marschall P, Flessa S. Efficiency of primary care in rural Burkina Faso. A two-stage DEA analysis. *Health Econ Rev* 2011;1(1):5. doi: 10.1186/2191-1991-1-5
  20. Goudarzi R, Pourreza A, Shokoohi M, et al. Technical efficiency of teaching hospitals in Iran: the use of Stochastic Frontier Analysis, 1999-2011. *Int J Health Policy Manag* 2014;3(2):91-7. doi: 10.15171/ijhpm.2014.66
  21. Lei RJ, Li SW, Ji ZH. Comparative study of TOPSIS and RSR in evaluation of hospital bed utilization efficiency. *China health statistics* 2019;36(03):430-32. doi: none
  22. Marschall P, Flessa S. Assessing the efficiency of rural health centres in Burkina Faso: an

- 1  
2  
3 application of Data Envelopment Analysis. *J Public Health* 2009;17(2):87.doi:  
4 10.1007/s10389-008-0225-6  
5  
6 23.Kirigia JM, Sambo LG, Renner A, et al. Technical efficiency of primary health units in Kailahun  
7 and Kenema districts of Sierra Leone. *Int Arch Med* 2011;4:15.doi: 10.1186/1755-7682-4-15  
8  
9 24.Ichoku HE, Fonta WM, Onwujekwe OE, et al. Evaluating the Technical Efficiency of Hospitals in  
10 Southeastern Nigeria. *European Journal of Business Management* 2011;3:24-37.doi: none  
11  
12 25.Ferreira C, Marques RC, Nicola P. On evaluating health centers groups in Lisbon and Tagus Valley:  
13 efficiency, equity and quality. *BMC Health Serv Res* 2013;13:529.doi: 10.1186/1472-6963-13-529  
14  
15 26.Farrell MJ. The Measurement of Productive Efficiency. *J R Stat Soc* 1957;120(3):253-90.doi:  
16 10.2307/2343100  
17  
18 27.Charnes A, Clark CT, Cooper WW, et al. A developmental study of data envelopment analysis in  
19 measuring the efficiency of maintenance units in the U.S. air forces. *Ann Oper Res*  
20 1984;2(1):95-112.doi: 10.1007/BF01874734  
21  
22 28.Jacobs R. Alternative methods to examine hospital efficiency: data envelopment analysis and  
23 stochastic frontier analysis. *Health Care Manag Sci* 2001;4(2):103-15.doi:  
24 10.1023/A:1011453526849  
25  
26 29.Banker RD, Charnes A, Cooper WW. Some Models for Estimating Technical and Scale  
27 Inefficiencies in Data Envelopment Analysis. *Manage Sci* 1984;30(9):1078-92.doi:  
28 10.1287/mnsc.30.9.1078  
29  
30 30.Servan-Mori E, Chivardi C, Mendoza MA, et al. A longitudinal assessment of technical efficiency  
31 in the outpatient production of maternal health services in Mexico. *Health Policy Plan*  
32 2018;33(8):888-97.doi: 10.1093/heapol/czy074  
33  
34 31.Cheng Z, Tao H, Cai M, et al. Technical efficiency and productivity of Chinese county hospitals: an  
35 exploratory study in Henan province, China. *BMJ open* 2015;5(9):e007267.doi:  
36 10.1136/bmjopen-2014-007267  
37  
38 32.Wang X, Luo H, Qin X, et al. Evaluation of performance and impacts of maternal and child health  
39 hospital services using Data Envelopment Analysis in Guangxi Zhuang Autonomous Region,  
40 China: a comparison study among poverty and non-poverty county level hospitals. *Int J Equity*  
41 *Health* 2016;15(1):131.doi: 10.1186/s12939-016-0420-y  
42  
43 33.Zhang Y, Wang Q, Jiang T, et al. Equity and efficiency of primary health care resource allocation in  
44 mainland China. *Int J Equity Health* 2018;17(1):140.doi: 10.1186/s12939-018-0851-8  
45  
46 34.Zhang T. "Finding Reasons" and "Suggestions" for Public Hospital Expansion. *China Hospital*  
47 *Dean* 2017(15):64-67.doi: none  
48  
49 35.Zhang RH, Liu L, Li WH, et al. Evaluation of medical and health service efficiency in 31 provinces  
50 and municipalities in China based on Data Envelopment Analysis. *China Health Economics*  
51 2011;30(02):69-72.doi: 10.3969/j.issn.1003-0743.2011.02.025  
52  
53 36.Asmild M, Hollingsworth B, Birch S. The scale of hospital production in different settings: one size  
54 does not fit all. *Journal of Productivity analysis* 2013;40(2):197-206.doi:  
55 10.1007/s11123-012-0332-9  
56  
57 37.Zhou WT, Jin Cl, Li F, et al. Analysis of operational efficiency of health system in districts and  
58 counties of Shanghai. *China health statistics* 2017;34(03):445-47+52.doi: none  
59  
60 38.Dong SP. Study on the efficiency of scale economy and its influencing factors in county-level  
general hospitals. Huazhong University of Science and Technology, 2010.  
39.Lothgren M, Tambour M. Testing scale efficiency in DEA models: a bootstrapping approach. *Appl*

1  
2  
3  
4  
5  
6  
7  
8  
9  
10  
11  
12  
13  
14  
15  
16  
17  
18  
19  
20  
21  
22  
23  
24  
25  
26  
27  
28  
29  
30  
31  
32  
33  
34  
35  
36  
37  
38  
39  
40  
41  
42  
43  
44  
45  
46  
47  
48  
49  
50  
51  
52  
53  
54  
55  
56  
57  
58  
59  
60

*Econ* 1999;31(10):1231-37.doi: 10.1080/000368499323445

40.Wilson PW, Carey K. Nonparametric analysis of returns to scale in the us hospital industry. *Journal of Applied Econometrics* 2004;19(4):505-24.doi: 10.1002/jae.801

41.Banker RD. Estimating most productive scale size using data envelopment analysis. *Eur J Oper Res*;17(1):35-44.doi: 10.1016/0377-2217(84)90006-7

42.Roh CY, Moon MJ, Jung C. Measuring Performance of U.S. Nonprofit Hospitals. *Public Performance & Management Review* 2010;34(1):22-37.doi: 10.2753/pmr1530-9576340102

For peer review only



1  
2  
3  
4  
5  
6  
7  
8  
9  
10  
11  
12  
13  
14  
15  
16  
17  
18  
19  
20  
21  
22  
23  
24  
25  
26  
27  
28  
29  
30  
31  
32  
33  
34  
35  
36  
37  
38  
39  
40  
41  
42  
43  
44  
45  
46  
47  
48  
49  
50  
51  
52  
53  
54  
55  
56  
57  
58  
59  
60



Figure 1 Scatter plot of the relationship between bed size and scale efficiency and returns to scale

## Appendix 1.

## The efficiency scores of all sample hospitals

| DMU | Bed size | TE    | PTE   | SE    | RTS |
|-----|----------|-------|-------|-------|-----|
| H1  | 185      | 1.000 | 1.000 | 1.000 | -   |
| H2  | 380      | 1.000 | 1.000 | 1.000 | -   |
| H3  | 460      | 0.964 | 0.996 | 0.998 | irs |
| H4  | 500      | 0.896 | 0.937 | 0.956 | irs |
| H5  | 504      | 0.878 | 0.917 | 0.958 | irs |
| H6  | 518      | 1.000 | 1.000 | 1.000 | -   |
| H7  | 520      | 0.963 | 1.000 | 0.963 | irs |
| H8  | 564      | 0.902 | 0.914 | 0.987 | irs |
| H9  | 588      | 1.000 | 1.000 | 1.000 | -   |
| H10 | 600      | 0.864 | 0.881 | 0.981 | irs |
| H11 | 662      | 1.000 | 1.000 | 1.000 | -   |
| H12 | 668      | 0.905 | 0.925 | 0.978 | irs |
| H13 | 684      | 0.868 | 0.890 | 0.976 | irs |
| H14 | 692      | 0.977 | 0.985 | 0.991 | irs |
| H15 | 709      | 0.706 | 0.726 | 0.972 | irs |
| H16 | 717      | 0.932 | 0.940 | 0.992 | irs |
| H17 | 750      | 0.853 | 0.870 | 0.981 | irs |
| H18 | 752      | 0.862 | 0.867 | 0.994 | irs |
| H19 | 790      | 1.000 | 1.000 | 1.000 | -   |
| H20 | 800      | 0.954 | 0.957 | 0.997 | irs |
| H21 | 800      | 1.000 | 1.000 | 1.000 | -   |
| H22 | 800      | 1.000 | 1.000 | 1.000 | -   |
| H23 | 808      | 0.907 | 0.910 | 0.996 | irs |
| H24 | 820      | 0.829 | 0.841 | 0.985 | irs |
| H25 | 850      | 1.000 | 1.000 | 1.000 | -   |
| H26 | 854      | 0.925 | 0.926 | 0.998 | irs |
| H27 | 862      | 0.903 | 0.906 | 0.997 | irs |
| H28 | 862      | 1.000 | 1.000 | 1.000 | -   |
| H29 | 885      | 0.887 | 0.889 | 0.998 | drs |
| H30 | 889      | 0.900 | 0.905 | 0.995 | irs |
| H31 | 894      | 0.935 | 0.939 | 0.996 | irs |
| H32 | 900      | 0.919 | 0.932 | 0.986 | irs |
| H33 | 967      | 0.934 | 0.944 | 0.990 | drs |
| H34 | 991      | 0.951 | 0.953 | 0.998 | irs |
| H35 | 992      | 0.866 | 0.871 | 0.995 | irs |
| H36 | 1000     | 0.942 | 0.944 | 0.998 | irs |
| H37 | 1000     | 0.886 | 0.886 | 1.000 | -   |
| H38 | 1000     | 0.975 | 0.978 | 0.998 | irs |
| H39 | 1000     | 0.946 | 0.946 | 1.000 | -   |

|     |      |       |       |       |     |
|-----|------|-------|-------|-------|-----|
| H40 | 1000 | 1.000 | 1.000 | 1.000 | -   |
| H41 | 1018 | 1.000 | 1.000 | 1.000 | -   |
| H42 | 1030 | 0.875 | 0.896 | 0.977 | drs |
| H43 | 1048 | 0.971 | 0.973 | 0.998 | drs |
| H44 | 1050 | 1.000 | 1.000 | 1.000 | -   |
| H45 | 1055 | 0.884 | 0.884 | 1.000 | -   |
| H46 | 1065 | 0.889 | 0.898 | 0.990 | irs |
| H47 | 1100 | 0.977 | 1.000 | 0.977 | irs |
| H48 | 1100 | 1.000 | 1.000 | 1.000 | -   |
| H49 | 1178 | 1.000 | 1.000 | 1.000 | -   |
| H50 | 1200 | 1.000 | 1.000 | 1.000 | -   |
| H51 | 1200 | 0.911 | 0.915 | 0.996 | drs |
| H52 | 1200 | 1.000 | 1.000 | 1.000 | -   |
| H53 | 1225 | 0.936 | 0.940 | 0.996 | drs |
| H54 | 1227 | 1.000 | 1.000 | 1.000 | -   |
| H55 | 1240 | 0.975 | 1.000 | 0.975 | drs |
| H56 | 1270 | 0.976 | 0.981 | 0.995 | drs |
| H57 | 1289 | 0.898 | 0.918 | 0.979 | drs |
| H58 | 1302 | 1.000 | 1.000 | 1.000 | -   |
| H59 | 1334 | 0.991 | 1.000 | 0.991 | drs |
| H60 | 1410 | 0.927 | 0.960 | 0.965 | drs |
| H61 | 1450 | 0.960 | 1.000 | 0.96  | drs |
| H62 | 1469 | 0.921 | 0.944 | 0.975 | drs |
| H63 | 1480 | 0.916 | 0.934 | 0.980 | drs |
| H64 | 1502 | 0.877 | 0.914 | 0.960 | drs |
| H65 | 1600 | 0.943 | 0.996 | 0.947 | drs |
| H66 | 1869 | 0.910 | 0.983 | 0.926 | drs |
| H67 | 2043 | 1.000 | 1.000 | 1.000 | -   |
| H68 | 2220 | 0.921 | 1.000 | 0.921 | drs |

STROBE Statement—Checklist of items that should be included in reports of *cross-sectional studies*

|                           | Item No. | Recommendation                                                                                                                                                                                                                                                                                                                                                                                                                                                                                                                                                                                                                                                                                                                                                                                                                                                                                                                                                                                                                                                                                                                                                                                                                                                                                                                                                                                                                             | Page No. |
|---------------------------|----------|--------------------------------------------------------------------------------------------------------------------------------------------------------------------------------------------------------------------------------------------------------------------------------------------------------------------------------------------------------------------------------------------------------------------------------------------------------------------------------------------------------------------------------------------------------------------------------------------------------------------------------------------------------------------------------------------------------------------------------------------------------------------------------------------------------------------------------------------------------------------------------------------------------------------------------------------------------------------------------------------------------------------------------------------------------------------------------------------------------------------------------------------------------------------------------------------------------------------------------------------------------------------------------------------------------------------------------------------------------------------------------------------------------------------------------------------|----------|
| <b>Title and abstract</b> | 1        | (a) A Study on the Efficiency and Scale Effect of County Public Hospitals in Shandong Province, China                                                                                                                                                                                                                                                                                                                                                                                                                                                                                                                                                                                                                                                                                                                                                                                                                                                                                                                                                                                                                                                                                                                                                                                                                                                                                                                                      | 1        |
|                           |          | (b) Data envelopment analysis (DEA) was used to calculate the efficiency scores of hospitals. Kruskal-Wallis H and Chi-square ( $\chi^2$ ) test were employed to compare the efficiency and returns to scale (RTS) of hospitals with different bed sizes respectively. The study found that the difference of scale efficiency (SE, $P=0.047$ , $P<0.05$ ) and returns to scale (RTS, $P<0.001$ ) were statistically significant. The findings indicated that hospitals with DRS began to appear at 885 beds. All sample hospitals with more than 1100 beds were already saturated, and some hospitals even had a negative scale effect.                                                                                                                                                                                                                                                                                                                                                                                                                                                                                                                                                                                                                                                                                                                                                                                                   | 1        |
| <b>Introduction</b>       |          |                                                                                                                                                                                                                                                                                                                                                                                                                                                                                                                                                                                                                                                                                                                                                                                                                                                                                                                                                                                                                                                                                                                                                                                                                                                                                                                                                                                                                                            |          |
| Background/rationale      | 2        | The unreasonable allocation and utilization of health resources and the blind explosion of hospital scale have seriously affected the production efficiency of health services. In 2016, with regard to the healthcare sector, the “Guiding Principles for the Planning of Medical Institutions (2016-2020)” were issued; these principles required hospitals to strictly control the bed size. Unfortunately, there has been no significant effect. In fact, in most hospitals, the number of beds is still on the rise. Novosadova et al <sup>10</sup> compared the efficiency of large and small acute hospitals and gave scores in terms of technical and scale efficiency. It turned out that smaller hospitals tend to be more efficient than larger ones. Regardless of whether hospitals are in China or elsewhere, conducting studies on hospital efficiency and scale economies is crucial to address the question of the optimal productive size and to manage a fair allocation of resources. In 2015, the comprehensive reform of county public hospitals was fully rolled out in China. The status of hospital efficiency after the reform needs to be evaluated. The relationship between efficiency and bed size is also of great interest to managers. Based on efficiency theory and production theory, data envelopment analysis is used to analyze the efficiency of hospitals and the scale effect of efficiency from | 2-3      |

|                |   |                                                                                                                                                                                                                                                                                                                                                                                                                                                                                                                                                                                                                                                                                                                                                                          |     |
|----------------|---|--------------------------------------------------------------------------------------------------------------------------------------------------------------------------------------------------------------------------------------------------------------------------------------------------------------------------------------------------------------------------------------------------------------------------------------------------------------------------------------------------------------------------------------------------------------------------------------------------------------------------------------------------------------------------------------------------------------------------------------------------------------------------|-----|
|                |   | the inputs and outputs.                                                                                                                                                                                                                                                                                                                                                                                                                                                                                                                                                                                                                                                                                                                                                  |     |
| Objectives     | 3 | To evaluate the efficiency of county public hospitals in Shandong Province after the new medical reform in China and to explore the scale effect.                                                                                                                                                                                                                                                                                                                                                                                                                                                                                                                                                                                                                        | 3   |
| <b>Methods</b> |   |                                                                                                                                                                                                                                                                                                                                                                                                                                                                                                                                                                                                                                                                                                                                                                          |     |
| Study design   | 4 | The study selected seven input and output variables that fit the characteristics of hospital efficiency. The main purpose of the study was to use DEA-CCR and DEA-BBC to evaluate the efficiency of county level public hospitals, and to compare the efficiency of hospitals with different bed size groups. Efficiency included technical efficiency (TE), pure technical efficiency (PTE), and scale efficiency (SE). The Kruskal-Wallis H non-parametric test was used to compare the efficiency of hospitals with different bed size. Efficiency included technical efficiency, pure technical efficiency, and scale efficiency. The Chi-square ( $\chi^2$ ) test was used to compare the differences in the returns to scale of hospitals with different bed size. | 4-6 |
| Setting        | 5 | The data set was collected from the health statistics information reporting system of the Hospital Management Research Institute of Qingdao University and was provided by 71 county public hospitals. The data collection time is from March to June 2018. It is mainly provided by the statisticians of each hospital to the Institute of Hospital Management of Qingdao University through electronic data sheets, and then all the data is consolidated by the Hospital Management Institute.                                                                                                                                                                                                                                                                        | 4   |
| Participants   | 6 | Participants came from 68 county public general hospitals. First, DEA premised on the selection of similar decision-making units; thus, the sample consists of county public general hospitals. Second, all no variables in the sample hospitals should include missing or abnormal values. Third, this study selected counties with one and only one general hospital. Therefore, combining the above requirements, the study finally identified 68 hospitals.                                                                                                                                                                                                                                                                                                          | 4   |
| Variables      | 7 | Variables included 4 inputs and 3 outputs. The study used the actual number of open beds, the number of doctors, the number of nurses, and the total expenditure as inputs, representing the investment in three aspects of human, financial and material resources. The total number of annual visits, the number of                                                                                                                                                                                                                                                                                                                                                                                                                                                    | 4   |

discharges, and the total income were used as outputs to represent the quantity, quality and benefits of medical services. Seven variables were applied to the DEA model to calculate efficiency. We also used the actual number of open beds to explore the impact of bed size on hospital efficiency.

|                           |    |                                                                                                                                                                                                                                                                                                                                                                                                                                                                                                                                                                                                                                                                                                                                                                                                                                  |    |
|---------------------------|----|----------------------------------------------------------------------------------------------------------------------------------------------------------------------------------------------------------------------------------------------------------------------------------------------------------------------------------------------------------------------------------------------------------------------------------------------------------------------------------------------------------------------------------------------------------------------------------------------------------------------------------------------------------------------------------------------------------------------------------------------------------------------------------------------------------------------------------|----|
| Data sources/ measurement | 8* | The data related to the variables are reported personally by the participating hospitals and derived from the Shandong Province Statistical Yearbook of Health. Actual number of open beds measured by the number of beds actually opened at the end of the year. The number of doctors referred to the number of practising (assistant) physicians. The number of nurses referred to the number of qualified nurse practitioners. Total expenditure calculated by the expenses incurred by the hospital at the end of the year. Total number of annual visits measured by the number of visits counted by the number of registrations. Number of discharges measured by the number of all discharges patients after hospitalization. Total income calculated by the total income earned by the hospital at the end of the year. | 4  |
| Bias                      | 9  | Bias adjustments of efficiency scores were not carried out due to limitation of Coelli 's basic DEA approach.                                                                                                                                                                                                                                                                                                                                                                                                                                                                                                                                                                                                                                                                                                                    | 11 |
| Study size                | 10 | Sixty-eight county public general hospitals met the research objectives and inclusion criteria. The sample size is therefore determined.                                                                                                                                                                                                                                                                                                                                                                                                                                                                                                                                                                                                                                                                                         | 4  |
| Quantitative variables    | 11 | The sample hospitals are divided into four groups: 500 beds and below, 501-1000 beds, 1001-1500 beds and 1501 beds and above. The difference of hospital efficiency in different bed size was compared by grouping.                                                                                                                                                                                                                                                                                                                                                                                                                                                                                                                                                                                                              | 6  |
| Statistical methods       | 12 | (a) Kruskal-Wallis H test was used to compare the efficiency of hospitals with different bed sizes.                                                                                                                                                                                                                                                                                                                                                                                                                                                                                                                                                                                                                                                                                                                              | 6  |
|                           |    | (b) The Chi-square ( $\chi^2$ ) test was used to compare the differences in the returns to scale of hospitals with different bed sizes.                                                                                                                                                                                                                                                                                                                                                                                                                                                                                                                                                                                                                                                                                          | 6  |
|                           |    | (c) Study removed samples with missing data or abnormal values.                                                                                                                                                                                                                                                                                                                                                                                                                                                                                                                                                                                                                                                                                                                                                                  | 4  |
| <b>Results</b>            |    |                                                                                                                                                                                                                                                                                                                                                                                                                                                                                                                                                                                                                                                                                                                                                                                                                                  |    |

|    |                  |     |                                                                                                                                                                                                                                                                                                        |
|----|------------------|-----|--------------------------------------------------------------------------------------------------------------------------------------------------------------------------------------------------------------------------------------------------------------------------------------------------------|
| 1  |                  |     |                                                                                                                                                                                                                                                                                                        |
| 2  |                  |     |                                                                                                                                                                                                                                                                                                        |
| 3  |                  |     |                                                                                                                                                                                                                                                                                                        |
| 4  | Participants     | 13* | (a) Participants included 71 county public general hospitals, but 68 hospitals that passed the audit and participated in the final analysis. 4                                                                                                                                                         |
| 5  |                  |     |                                                                                                                                                                                                                                                                                                        |
| 6  |                  |     |                                                                                                                                                                                                                                                                                                        |
| 7  |                  |     | (b) Two hospitals were removed for missing data. Another hospital was removed because the district it belonged to was merged. 4                                                                                                                                                                        |
| 8  |                  |     |                                                                                                                                                                                                                                                                                                        |
| 9  |                  |     |                                                                                                                                                                                                                                                                                                        |
| 10 | Descriptive data | 14* | (a) The participants were county public general hospitals in Shandong Province, which mainly provide medical services to residents in the county. 4                                                                                                                                                    |
| 11 |                  |     |                                                                                                                                                                                                                                                                                                        |
| 12 |                  |     |                                                                                                                                                                                                                                                                                                        |
| 13 |                  |     | (b) A sample hospital without the number of nurse. Another sample hospital without the number of beds. The district to which the third sample hospital belongs was merged. Therefore, the three hospitals was removed. 4                                                                               |
| 14 |                  |     |                                                                                                                                                                                                                                                                                                        |
| 15 |                  |     |                                                                                                                                                                                                                                                                                                        |
| 16 |                  |     |                                                                                                                                                                                                                                                                                                        |
| 17 |                  |     |                                                                                                                                                                                                                                                                                                        |
| 18 | Outcome data     | 15* | The data indicate that the average number of open beds per hospital was 991.0 in 2017. The average number of doctors and nurses per hospital was 352.7 and 529.3 respectively. With an average of 527,816.1 visits per hospital per year, the efficiency of the hospitals was commendable. 6           |
| 19 |                  |     |                                                                                                                                                                                                                                                                                                        |
| 20 |                  |     |                                                                                                                                                                                                                                                                                                        |
| 21 |                  |     |                                                                                                                                                                                                                                                                                                        |
| 22 |                  |     |                                                                                                                                                                                                                                                                                                        |
| 23 |                  |     | Only 20 (29.41%) hospitals which technical efficiency calculated to be 100% efficient, and 48 (70.59%) hospitals were inefficient. 7                                                                                                                                                                   |
| 24 |                  |     |                                                                                                                                                                                                                                                                                                        |
| 25 |                  |     |                                                                                                                                                                                                                                                                                                        |
| 26 |                  |     |                                                                                                                                                                                                                                                                                                        |
| 27 |                  |     | The difference of the technical efficiency (P=0.248, P>0.05) and the pure technical efficiency (P=0.073, P>0.05) were not statistically significant. The difference of scale efficiency (P=0.047, P<0.05) and returns to scale (P<0.001) were statistically significant. 7-8                           |
| 28 |                  |     |                                                                                                                                                                                                                                                                                                        |
| 29 |                  |     |                                                                                                                                                                                                                                                                                                        |
| 30 |                  |     |                                                                                                                                                                                                                                                                                                        |
| 31 | Main results     | 16  | (a) Most of county public hospitals in Shandong Province were inefficient and had problems of excessive inputs or insufficient outputs. 7                                                                                                                                                              |
| 32 |                  |     |                                                                                                                                                                                                                                                                                                        |
| 33 |                  |     |                                                                                                                                                                                                                                                                                                        |
| 34 |                  |     | (b) Bed size had an impact on hospital scale efficiency and returns to scale. 8                                                                                                                                                                                                                        |
| 35 |                  |     |                                                                                                                                                                                                                                                                                                        |
| 36 |                  |     |                                                                                                                                                                                                                                                                                                        |
| 37 |                  |     | (c) With more than 885 beds, hospitals were beginning to enter the decreasing returns to scale. When the bed size exceeded 1100, there were no longer hospitals with IRS. All sample hospitals with more than 1100 beds were already saturated, and some hospitals even had a negative scale effect. 8 |
| 38 |                  |     |                                                                                                                                                                                                                                                                                                        |
| 39 |                  |     |                                                                                                                                                                                                                                                                                                        |
| 40 |                  |     |                                                                                                                                                                                                                                                                                                        |

|                   |    |                                                                                                                                                                                                                                                                                                                                                                                                                                                                                                                                                                                                                                                                                                                                                                                                                                                                                                                                                                                                                                                                                                                                                                                                                                                                                                                                                                                                                                                                                                                                                                                                                                                                                                                                                                                  |    |
|-------------------|----|----------------------------------------------------------------------------------------------------------------------------------------------------------------------------------------------------------------------------------------------------------------------------------------------------------------------------------------------------------------------------------------------------------------------------------------------------------------------------------------------------------------------------------------------------------------------------------------------------------------------------------------------------------------------------------------------------------------------------------------------------------------------------------------------------------------------------------------------------------------------------------------------------------------------------------------------------------------------------------------------------------------------------------------------------------------------------------------------------------------------------------------------------------------------------------------------------------------------------------------------------------------------------------------------------------------------------------------------------------------------------------------------------------------------------------------------------------------------------------------------------------------------------------------------------------------------------------------------------------------------------------------------------------------------------------------------------------------------------------------------------------------------------------|----|
| Other analyses    | 17 | None                                                                                                                                                                                                                                                                                                                                                                                                                                                                                                                                                                                                                                                                                                                                                                                                                                                                                                                                                                                                                                                                                                                                                                                                                                                                                                                                                                                                                                                                                                                                                                                                                                                                                                                                                                             |    |
| <b>Discussion</b> |    |                                                                                                                                                                                                                                                                                                                                                                                                                                                                                                                                                                                                                                                                                                                                                                                                                                                                                                                                                                                                                                                                                                                                                                                                                                                                                                                                                                                                                                                                                                                                                                                                                                                                                                                                                                                  |    |
| Key results       | 18 | The efficiency of county public hospitals needs to be improved. Bed size above a certain threshold will lead to decreasing returns to scale .                                                                                                                                                                                                                                                                                                                                                                                                                                                                                                                                                                                                                                                                                                                                                                                                                                                                                                                                                                                                                                                                                                                                                                                                                                                                                                                                                                                                                                                                                                                                                                                                                                    | 9  |
| Limitations       | 19 | First, the sample hospitals were selected from Shandong Province in eastern China, while hospitals located in central and western areas were excluded. Second, the data in this study cover only 2017, and cannot form panel data, leading to a lack of longitudinal analysis and comparison.                                                                                                                                                                                                                                                                                                                                                                                                                                                                                                                                                                                                                                                                                                                                                                                                                                                                                                                                                                                                                                                                                                                                                                                                                                                                                                                                                                                                                                                                                    | 11 |
| Interpretation    | 20 | There is still room for improvement of hospital efficiency in China, which is consistent with numerous studies. For example, Zhaohui Cheng, et al suggested that only 8.8% of the 114 sample hospitals in Henan Province in China were defined as technically efficient. In addition, When the number of beds exceeds 885, the returns to scale of the hospital began to move into the DRS. However, Siping Dong stated that the vast majority of county hospitals in Hubei Province had more than 335 beds, which was generally in a state of DRS. This may be related to different factors such as the population base of different provinces and the release of medical service demand due to the expansion of China's medical insurance coverage. Internationally, several articles in business and economics journals focused on evaluating the benefits of hospital scale have shown that the IRS appears in hospitals with 300 and 600 beds. Banker RD observed that increasing returns to scale could be exploited up to a capacity of approximately 200 beds. Our study concluded that IRS should be controlled below 1100 beds. The scale effect of all sample hospitals with more than 1100 beds was already saturated, and some hospitals even had a negative scale effect. Research undertaken in the USA and the United Kingdom indicated that diseconomies of scale can be expected to occur below approximately 200 beds and above 600 beds. Weaver M and Deolalikar A concluded that economies of scale depend on the type of hospital, as well as the number of beds and outputs in research on the scale economies of 654 Vietnamese public hospitals. China is a country with a large population, and its demand for medical services is higher than that of | 9  |



1  
2  
3  
4  
5  
6  
7  
8  
9  
10  
11  
12  
13  
14  
15  
16  
17  
18  
19  
20  
21  
22  
23  
24  
25  
26  
27  
28  
29  
30  
31  
32  
33  
34  
35  
36  
37  
38  
39  
40  
41  
42  
43  
44  
45  
46

---

other countries. The health sector has been implementing a hierarchical diagnosis and treatment model, and striving to make the county hospital visit rate 90% by 2020. The interval of beds for IRS in county public hospitals may be broader than that in other countries.

---

|                  |    |                                                                                                                                                                                                                                                                                                                                                                                                              |          |
|------------------|----|--------------------------------------------------------------------------------------------------------------------------------------------------------------------------------------------------------------------------------------------------------------------------------------------------------------------------------------------------------------------------------------------------------------|----------|
| Generalisability | 21 | Whether in China or elsewhere, conducting hospital efficiency and scale studies is urgent. Using data envelopment analysis to evaluate hospital efficiency, it enriches the research field of efficiency evaluation tool. This study confirmed that bed size is not the more the better. The finding can provide reference for other countries to improve hospital efficiency and control hospital bed size. | 3 and 11 |
|------------------|----|--------------------------------------------------------------------------------------------------------------------------------------------------------------------------------------------------------------------------------------------------------------------------------------------------------------------------------------------------------------------------------------------------------------|----------|

---

**Other information**

---

|         |    |      |  |
|---------|----|------|--|
| Funding | 22 | None |  |
|---------|----|------|--|

---

\*Give information separately for cases and controls in case-control studies and, if applicable, for exposed and unexposed groups in cohort and cross-sectional studies.

**Note:** An Explanation and Elaboration article discusses each checklist item and gives methodological background and published examples of transparent reporting. The STROBE checklist is best used in conjunction with this article (freely available on the Web sites of PLoS Medicine at <http://www.plosmedicine.org/>, Annals of Internal Medicine at <http://www.annals.org/>, and Epidemiology at <http://www.epidem.com/>). Information on the STROBE Initiative is available at [www.strobe-statement.org](http://www.strobe-statement.org).
