# Supplementary material for: Efficiency and scale effect of county public hospitals in Shandong Province, China: a cross-sectional study
Source: PubMed Central journal article supplement — BMJ Open. 2020 Jun 15;10(6):e035703. doi: 10.1136/bmjopen-2019-035703 (PMC7299019; doi:10.1136/bmjopen-2019-035703), 2020-06-15
Supplement: bmjopen-2019-035703supp001.pdf [file bmjopen-2019-035703supp001.pdf]

## Appendix 1.

## The efficiency scores of all sample hospitals

| DMU | Bed size | TE    | PTE   | SE    | RTS |
|-----|----------|-------|-------|-------|-----|
| H1  | 185      | 1.000 | 1.000 | 1.000 | -   |
| H2  | 380      | 1.000 | 1.000 | 1.000 | -   |
| H3  | 460      | 0.964 | 0.996 | 0.998 | irs |
| H4  | 500      | 0.896 | 0.937 | 0.956 | irs |
| H5  | 504      | 0.878 | 0.917 | 0.958 | irs |
| H6  | 518      | 1.000 | 1.000 | 1.000 | -   |
| H7  | 520      | 0.963 | 1.000 | 0.963 | irs |
| H8  | 564      | 0.902 | 0.914 | 0.987 | irs |
| H9  | 588      | 1.000 | 1.000 | 1.000 | -   |
| H10 | 600      | 0.864 | 0.881 | 0.981 | irs |
| H11 | 662      | 1.000 | 1.000 | 1.000 | -   |
| H12 | 668      | 0.905 | 0.925 | 0.978 | irs |
| H13 | 684      | 0.868 | 0.890 | 0.976 | irs |
| H14 | 692      | 0.977 | 0.985 | 0.991 | irs |
| H15 | 709      | 0.706 | 0.726 | 0.972 | irs |
| H16 | 717      | 0.932 | 0.940 | 0.992 | irs |
| H17 | 750      | 0.853 | 0.870 | 0.981 | irs |
| H18 | 752      | 0.862 | 0.867 | 0.994 | irs |
| H19 | 790      | 1.000 | 1.000 | 1.000 | -   |
| H20 | 800      | 0.954 | 0.957 | 0.997 | irs |
| H21 | 800      | 1.000 | 1.000 | 1.000 | -   |
| H22 | 800      | 1.000 | 1.000 | 1.000 | -   |
| H23 | 808      | 0.907 | 0.910 | 0.996 | irs |
| H24 | 820      | 0.829 | 0.841 | 0.985 | irs |
| H25 | 850      | 1.000 | 1.000 | 1.000 | -   |
| H26 | 854      | 0.925 | 0.926 | 0.998 | irs |
| H27 | 862      | 0.903 | 0.906 | 0.997 | irs |
| H28 | 862      | 1.000 | 1.000 | 1.000 | -   |
| H29 | 885      | 0.887 | 0.889 | 0.998 | drs |
| H30 | 889      | 0.900 | 0.905 | 0.995 | irs |
| H31 | 894      | 0.935 | 0.939 | 0.996 | irs |
| H32 | 900      | 0.919 | 0.932 | 0.986 | irs |
| H33 | 967      | 0.934 | 0.944 | 0.990 | drs |
| H34 | 991      | 0.951 | 0.953 | 0.998 | irs |
| H35 | 992      | 0.866 | 0.871 | 0.995 | irs |
| H36 | 1000     | 0.942 | 0.944 | 0.998 | irs |
| H37 | 1000     | 0.886 | 0.886 | 1.000 | -   |
| H38 | 1000     | 0.975 | 0.978 | 0.998 | irs |
| H39 | 1000     | 0.946 | 0.946 | 1.000 | -   |

|     |      |       |       |       |     |
|-----|------|-------|-------|-------|-----|
| H40 | 1000 | 1.000 | 1.000 | 1.000 | -   |
| H41 | 1018 | 1.000 | 1.000 | 1.000 | -   |
| H42 | 1030 | 0.875 | 0.896 | 0.977 | drs |
| H43 | 1048 | 0.971 | 0.973 | 0.998 | drs |
| H44 | 1050 | 1.000 | 1.000 | 1.000 | -   |
| H45 | 1055 | 0.884 | 0.884 | 1.000 | -   |
| H46 | 1065 | 0.889 | 0.898 | 0.990 | irs |
| H47 | 1100 | 0.977 | 1.000 | 0.977 | irs |
| H48 | 1100 | 1.000 | 1.000 | 1.000 | -   |
| H49 | 1178 | 1.000 | 1.000 | 1.000 | -   |
| H50 | 1200 | 1.000 | 1.000 | 1.000 | -   |
| H51 | 1200 | 0.911 | 0.915 | 0.996 | drs |
| H52 | 1200 | 1.000 | 1.000 | 1.000 | -   |
| H53 | 1225 | 0.936 | 0.940 | 0.996 | drs |
| H54 | 1227 | 1.000 | 1.000 | 1.000 | -   |
| H55 | 1240 | 0.975 | 1.000 | 0.975 | drs |
| H56 | 1270 | 0.976 | 0.981 | 0.995 | drs |
| H57 | 1289 | 0.898 | 0.918 | 0.979 | drs |
| H58 | 1302 | 1.000 | 1.000 | 1.000 | -   |
| H59 | 1334 | 0.991 | 1.000 | 0.991 | drs |
| H60 | 1410 | 0.927 | 0.960 | 0.965 | drs |
| H61 | 1450 | 0.960 | 1.000 | 0.96  | drs |
| H62 | 1469 | 0.921 | 0.944 | 0.975 | drs |
| H63 | 1480 | 0.916 | 0.934 | 0.980 | drs |
| H64 | 1502 | 0.877 | 0.914 | 0.960 | drs |
| H65 | 1600 | 0.943 | 0.996 | 0.947 | drs |
| H66 | 1869 | 0.910 | 0.983 | 0.926 | drs |
| H67 | 2043 | 1.000 | 1.000 | 1.000 | -   |
| H68 | 2220 | 0.921 | 1.000 | 0.921 | drs |
